# Supplementary material for: Synthesis of a model phyllobilin bearing an optical marker
Source: Royal Society of Chemistry journal article supplement (doi:10.1039/d4nj01533a), 2024-01-01

Supplementary Information for:

### Synthesis of A Model Phyllobilin Bearing an Optical Marker

Anh Thu Nguyen Tran,<sup>a</sup> Pengzhi Wang,<sup>a</sup> Shaofei Zhang,<sup>a</sup>  
Milena Jovanovic,<sup>a</sup> Bianka Siewert,<sup>b</sup> Simone Moser,<sup>b</sup> and Jonathan S. Lindsey<sup>a,\*</sup>

<sup>a</sup> Department of Chemistry  
North Carolina State University  
Raleigh, NC 27695-8204

<sup>b</sup> Department of Pharmacognosy  
Institute of Pharmacy  
University of Innsbruck  
Center for Chemistry and Biomedicine  
6020 Innsbruck – Austria

#### Table of Contents

| Topic                                                             | Page    |
|-------------------------------------------------------------------|---------|
| (1) Single-crystal X-ray diffraction data                         | S1–S2   |
| (2) Absorption spectra                                            | S3–S10  |
| (3) <sup>1</sup> H NMR assignments for model phyllobilin <b>8</b> | S11–S15 |
| (4) Spectral data                                                 | S16–S27 |

#### (1) Single-crystal X-ray diffraction data

Single-crystal X-ray crystallography of pyrrole **2** confirmed the position of the 2,2-dicyanovinyl group at the  $\alpha$ -position (Figure S1). Pyrrole **2** was crystallized by slow evaporation in CDCl<sub>3</sub>.

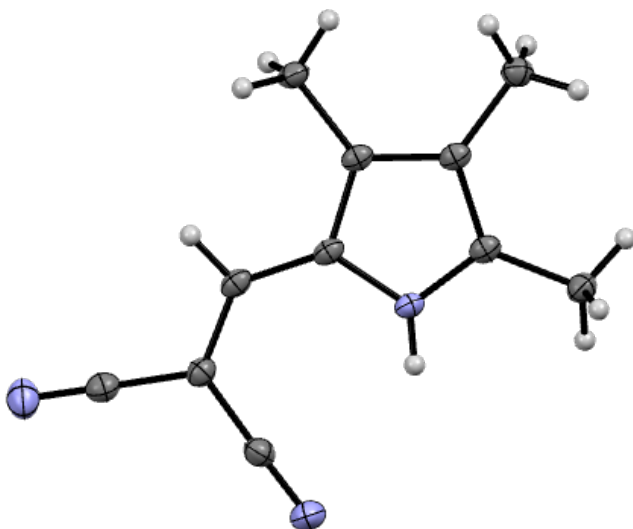

**Figure S1.** ORTEP diagram of pyrrole **2** with thermal ellipsoids drawn at the 50% probability level. Atom colors: C = grey, N = blue, and H = white).

**Table S1.** Single-crystal X-ray structure data for pyrrole **2**

|                                                 |                                                             |
|-------------------------------------------------|-------------------------------------------------------------|
| CCDC registry                                   | 2341280                                                     |
| Chemical formula                                | C <sub>11</sub> H <sub>12</sub> N <sub>3</sub>              |
| Formula weight (g/mol)                          | 185.23                                                      |
| Temperature (K)                                 | 100.0                                                       |
| Wavelength (Å)                                  | 0.71073                                                     |
| Crystal size (mm)                               | 0.08 × 0.26 × 0.573                                         |
| Crystal habit                                   | Clear light-yellow plate                                    |
| Crystal system                                  | monoclinic                                                  |
| Space group                                     | <i>C</i> 1 2 / <i>c</i> 1                                   |
| Unit cell dimensions, <i>a</i> (Å)              | 21.710(3)                                                   |
| Unit cell dimensions, <i>b</i> (Å)              | 3.9545(4)                                                   |
| Unit cell dimensions, <i>c</i> (Å)              | 23.298(3)                                                   |
| $\alpha$ , deg                                  | 90                                                          |
| $\beta$ , deg                                   | 92.074(5)                                                   |
| $\gamma$ , deg                                  | 90                                                          |
| Volume (Å <sup>3</sup> )                        | 1998.9(4)                                                   |
| <i>Z</i>                                        | 8                                                           |
| Density (calculated) (g/cm <sup>3</sup> )       | 1.231                                                       |
| Absorption coefficient (mm <sup>-1</sup> )      | 0.077                                                       |
| F(000)                                          | 784.0                                                       |
| Theta range for data collection, deg            | 2.520 to 26.730                                             |
| Index ranges                                    | -26 ≤ <i>h</i> ≤ 26, -5 ≤ <i>k</i> ≤ 5, -29 ≤ <i>l</i> ≤ 27 |
| Reflections collected                           | 2098                                                        |
| Independent reflections                         | <i>R</i> <sub>int</sub> = 0.045                             |
| <i>R</i> <sub>1</sub>                           | 0.0449                                                      |
| w <i>R</i> <sub>2</sub>                         | 0.1216                                                      |
| <i>R</i> <sub>1</sub> (all data)                | 0.0517                                                      |
| w <i>R</i> <sub>2</sub> (all data)              | 0.1168                                                      |
| Largest diff. peak and hole (eÅ <sup>-3</sup> ) | 0.348 and -0.355                                            |
| R.M.S. deviation from mean (eÅ <sup>-3</sup> )  | 0.047                                                       |

## (2) Absorption spectra

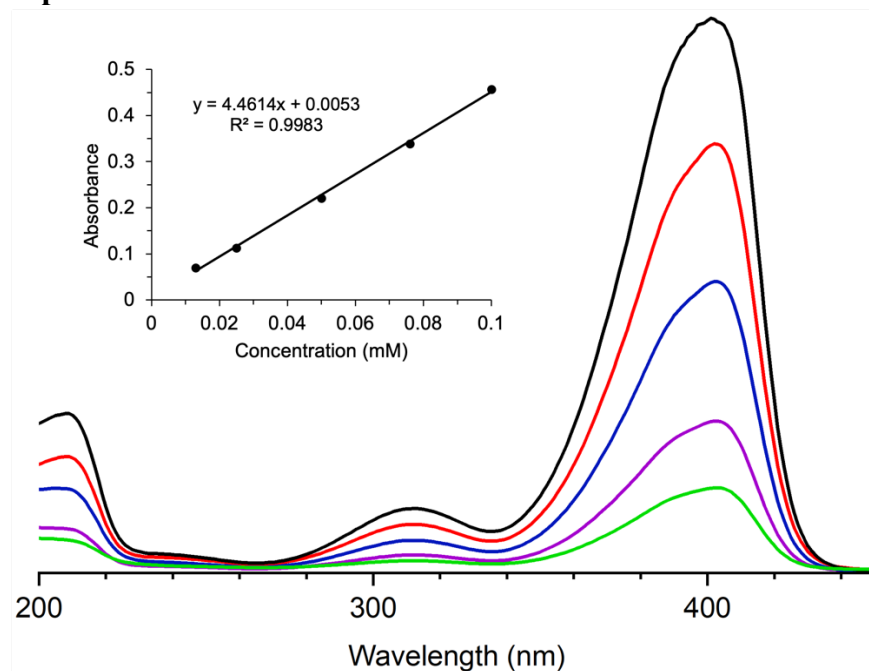

**Figure S2.** Absorption spectrum of **2** in acetonitrile at room temperature at different concentrations and the corresponding calibration curves for the peak at  $\sim 313$  nm ( $\epsilon = 4,600$  M<sup>-1</sup>cm<sup>-1</sup>).

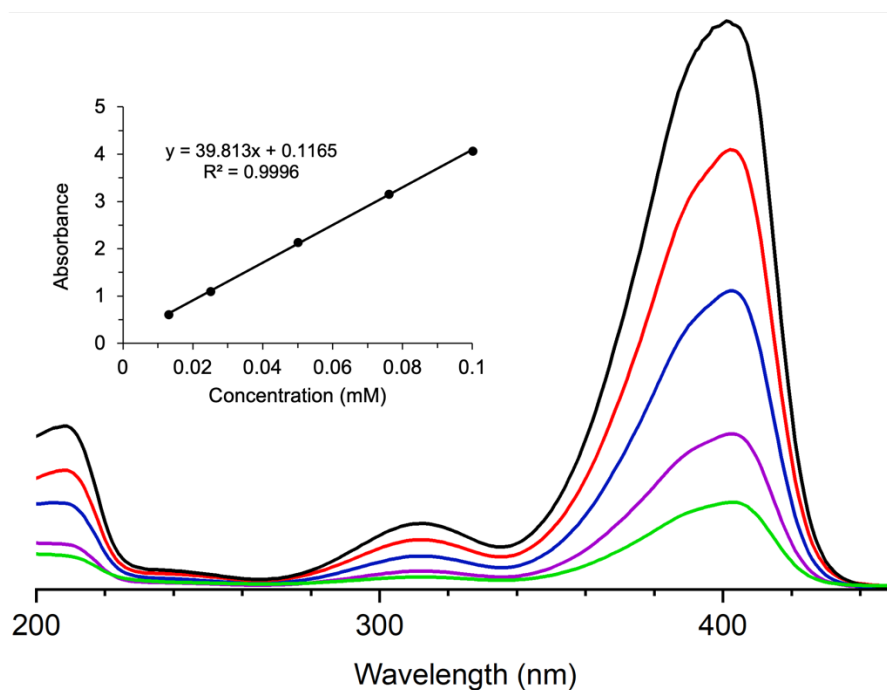

**Figure S3.** Absorption spectrum of **2** in acetonitrile at room temperature at different concentrations and the corresponding calibration curves for the peak at  $\sim 403$  nm ( $\epsilon = 43,000$  M<sup>-1</sup>cm<sup>-1</sup>).

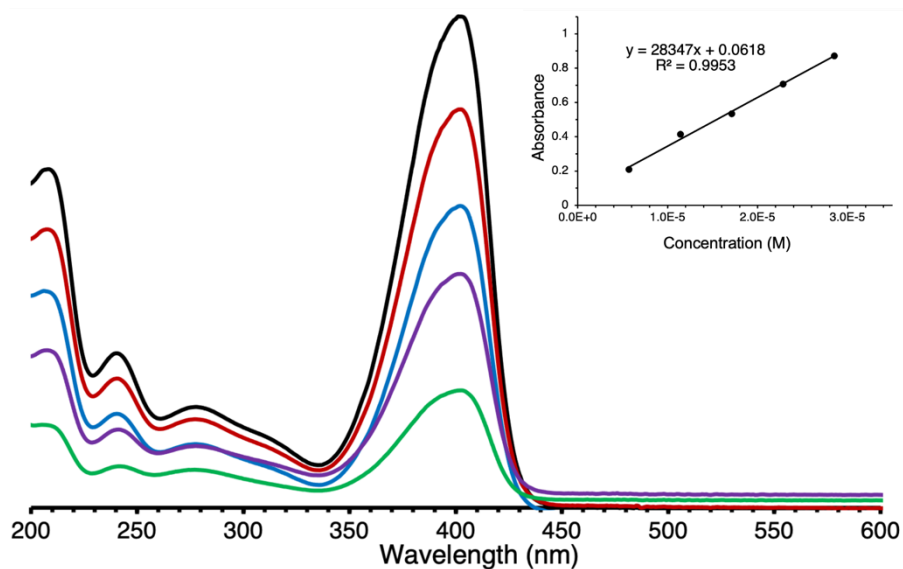

**Figure S4.** Absorption spectrum of **5** in acetonitrile at room temperature at different concentrations and the corresponding calibration curves for the peak at  $\sim 400$  nm ( $\epsilon = 28,000$  M $^{-1}$ cm $^{-1}$ ). A separate measurement, reported in the text, gave ( $\epsilon = 34,000$  M $^{-1}$ cm $^{-1}$ ).

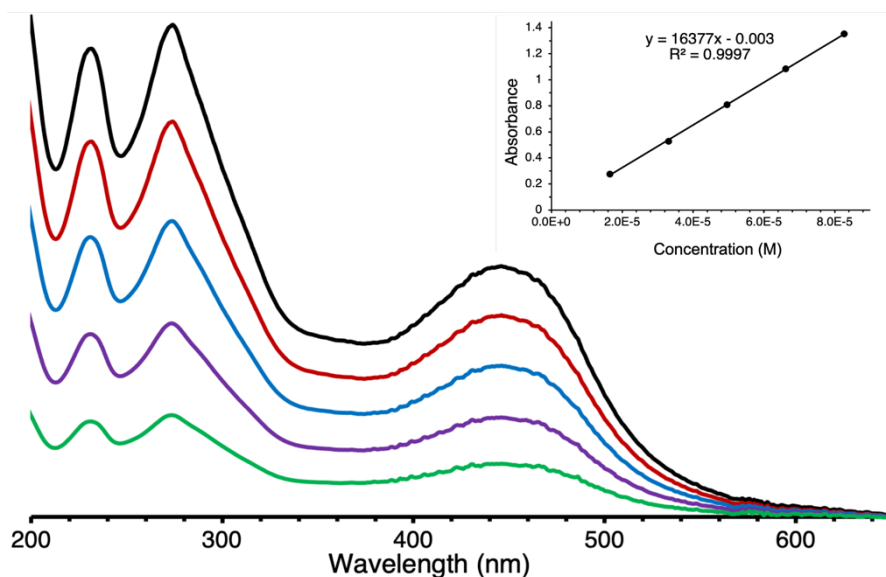

**Figure S5.** Absorption spectrum of **6** in acetonitrile at room temperature at different concentrations and the corresponding calibration curves for the peak at  $\sim 231$  nm ( $\epsilon = 16,000$  M $^{-1}$ cm $^{-1}$ ).

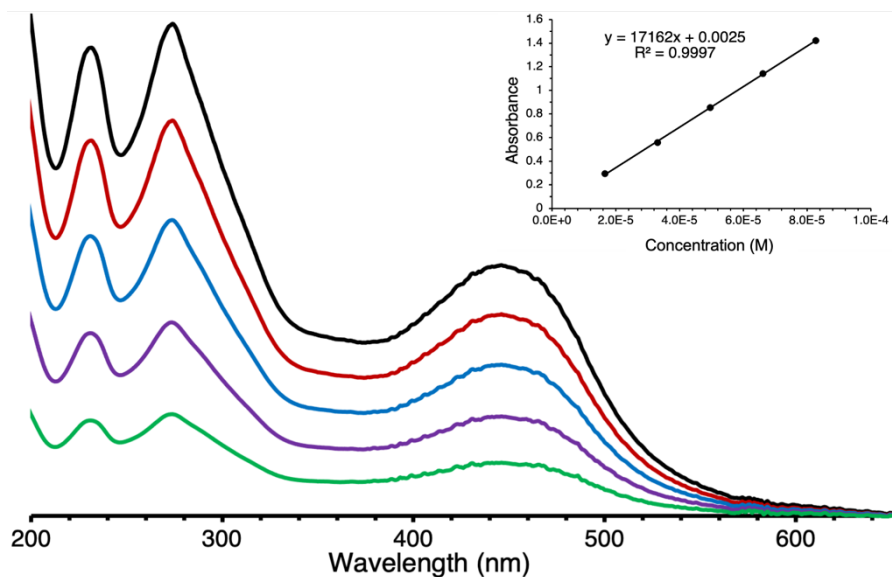

**Figure S6.** Absorption spectrum of **6** in acetonitrile at room temperature at different concentrations and the corresponding calibration curves for the peak at ~274 nm ( $\epsilon = 17,000 \text{ M}^{-1}\text{cm}^{-1}$ ).

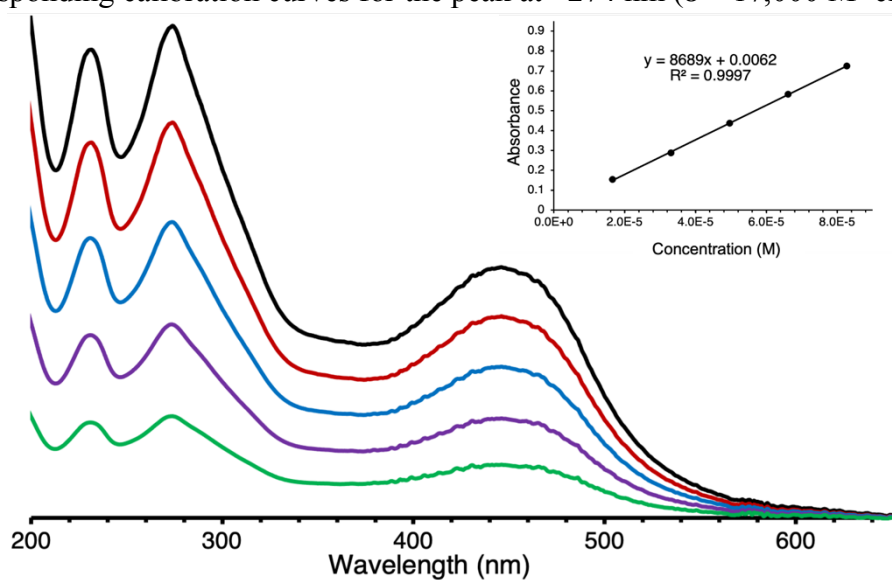

**Figure S7.** Absorption spectrum of **6** in acetonitrile at room temperature at different concentrations and the corresponding calibration curves for the peak at ~446 nm ( $\epsilon = 8,600 \text{ M}^{-1}\text{cm}^{-1}$ ).

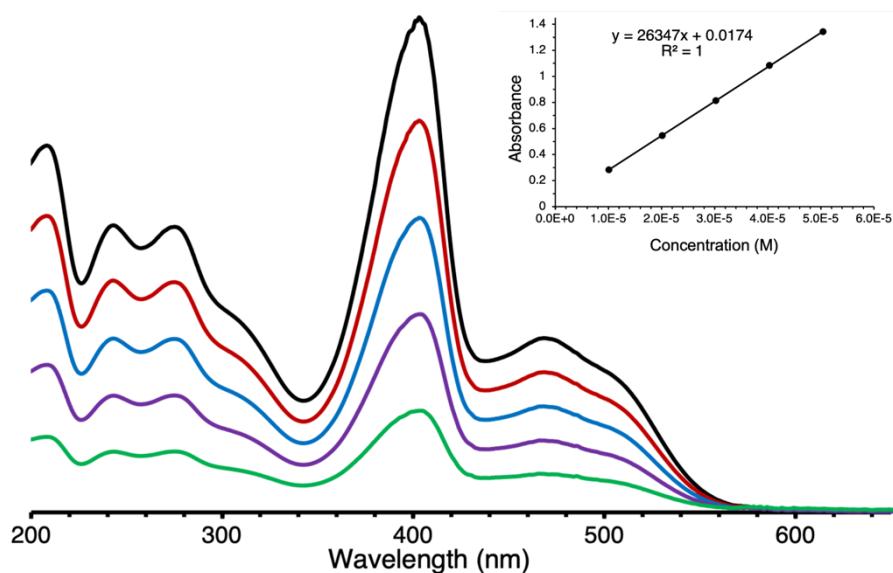

**Figure S8.** Absorption spectrum of 7 in acetonitrile at room temperature at different concentrations and the corresponding calibration curves for the peak at  $\sim 243$  nm ( $\epsilon = 26,000$  M<sup>-1</sup>cm<sup>-1</sup>).

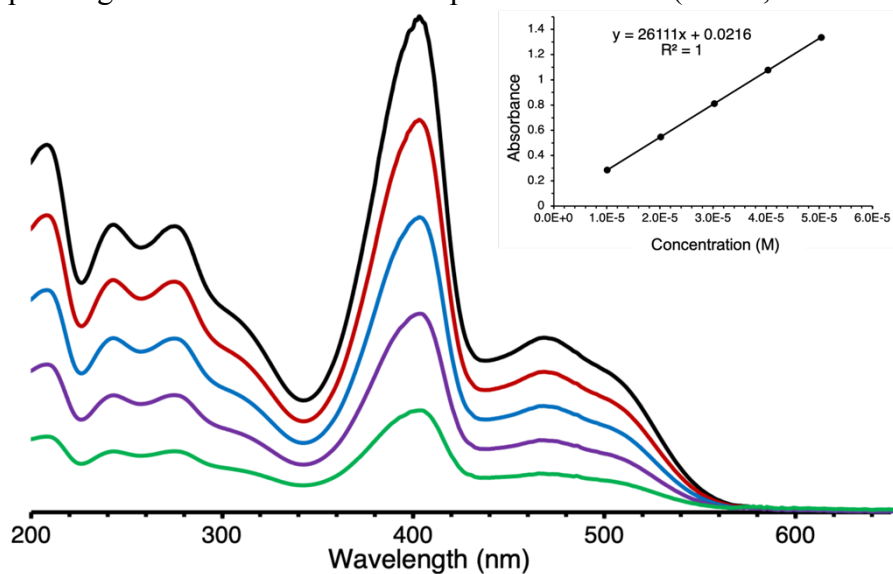

**Figure S9.** Absorption spectrum of 7 in acetonitrile at room temperature at different concentrations and the corresponding calibration curves for the peak at  $\sim 278$  nm ( $\epsilon = 22,000$  M<sup>-1</sup>cm<sup>-1</sup>).

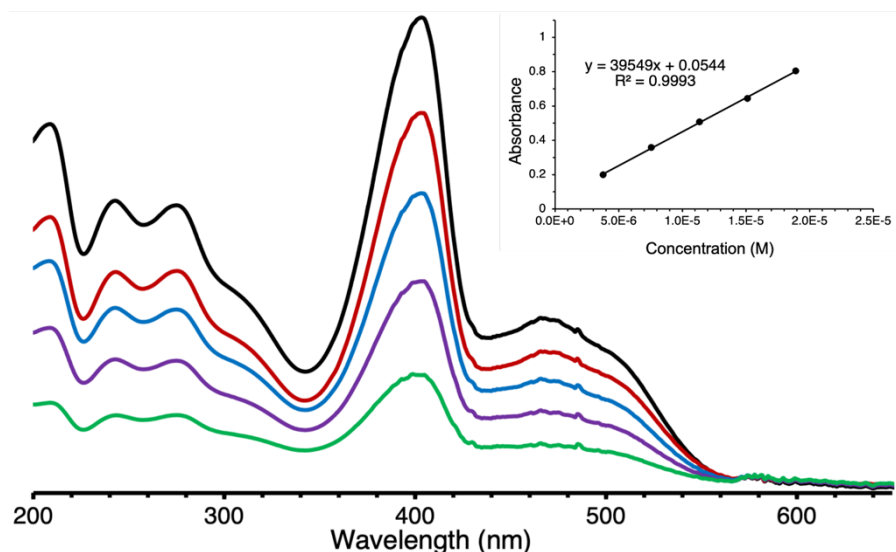

**Figure S10.** Absorption spectrum of **7** in acetonitrile at room temperature at different concentrations and the corresponding calibration curves for the peak at  $\sim 403$  nm ( $\epsilon = 34,000$   $M^{-1}cm^{-1}$ ).

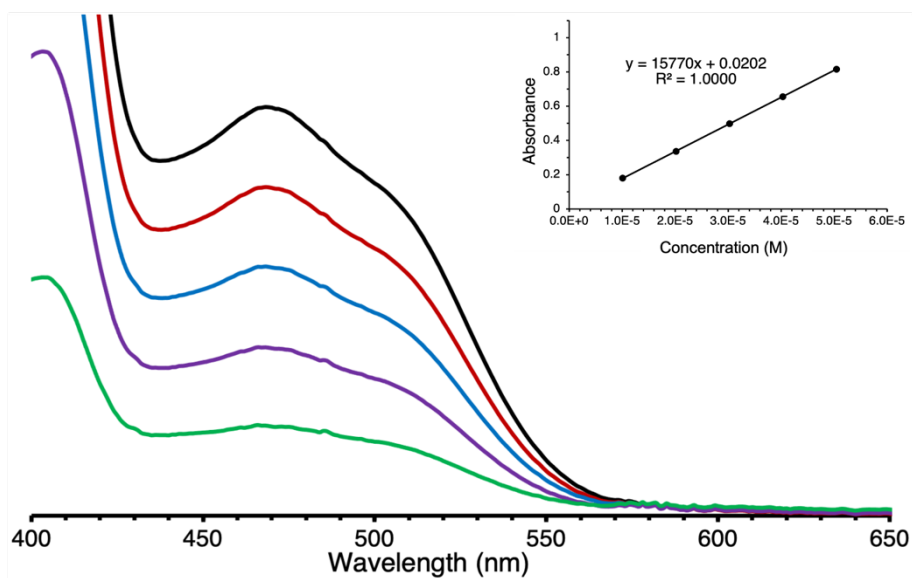

**Figure S11.** Absorption spectrum of **7** in acetonitrile at room temperature at different concentrations and the corresponding calibration curves for the peak at  $\sim 469$  nm ( $\epsilon = 12,000$   $M^{-1}cm^{-1}$ ).

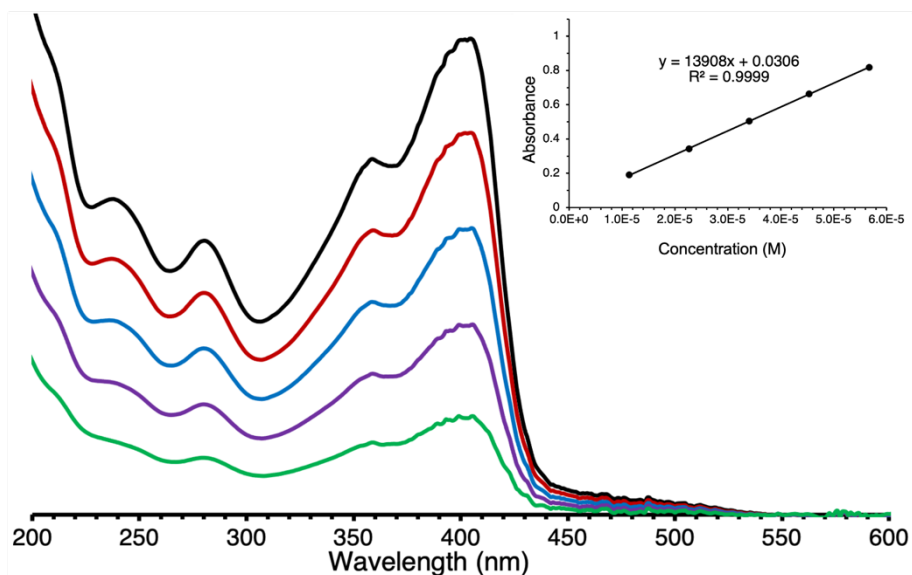

**Figure S12.** Absorption spectrum of **8** in acetonitrile at room temperature at different concentrations and the corresponding calibration curves for the peak at ~237 nm ( $\epsilon = 14,000 \text{ M}^{-1}\text{cm}^{-1}$ ).

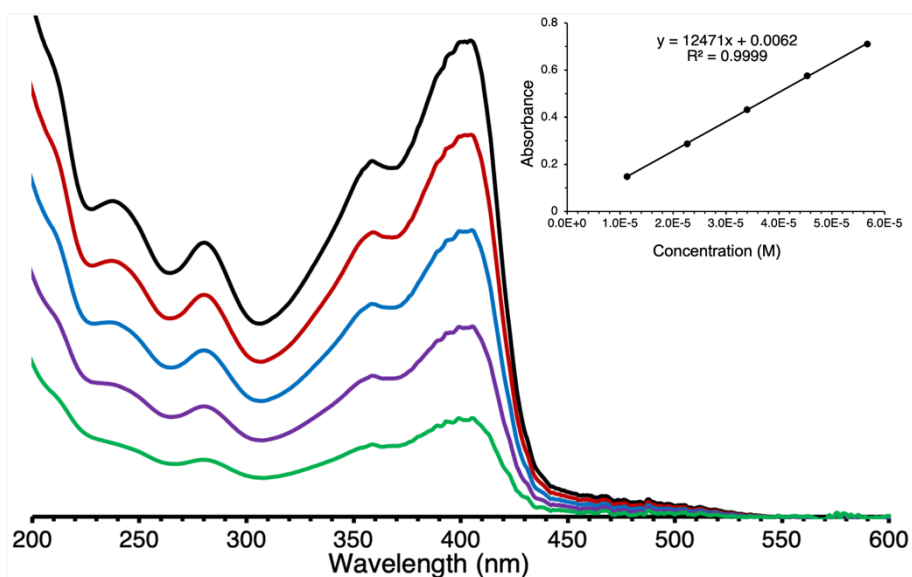

**Figure S13.** Absorption spectrum of **8** in acetonitrile at room temperature at different concentrations and the corresponding calibration curves for the peak at ~280 nm ( $\epsilon = 15,000 \text{ M}^{-1}\text{cm}^{-1}$ ).



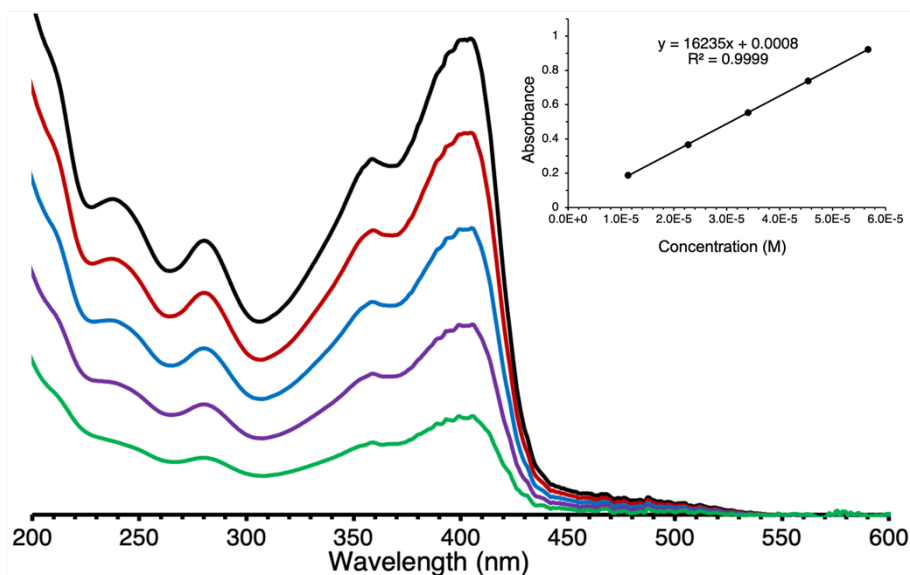

**Figure S14.** Absorption spectrum of **8** in acetonitrile at room temperature at different concentrations and the corresponding calibration curves for the peak at  $\sim 357$  nm ( $\epsilon = 20,000$   $M^{-1}cm^{-1}$ ).

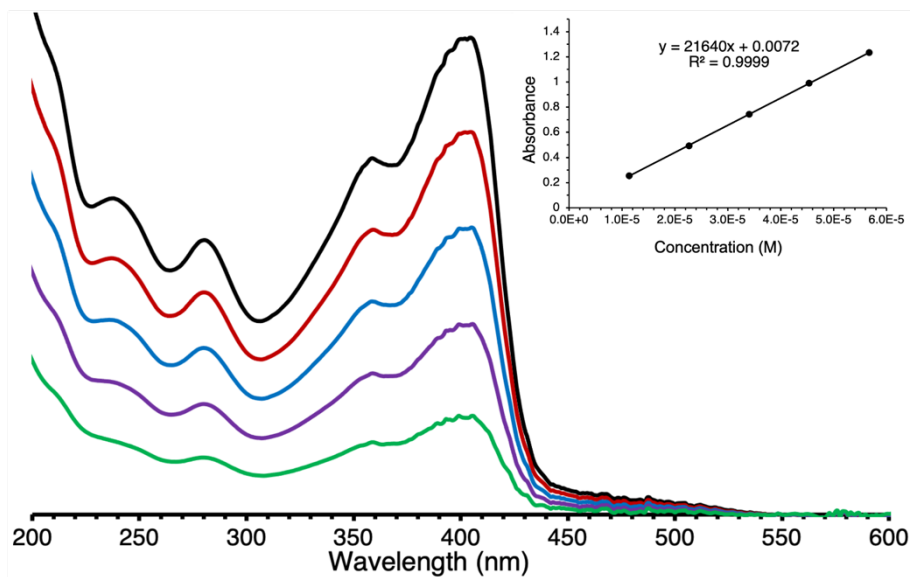

**Figure S15.** Absorption spectrum of **8** in acetonitrile at room temperature at different concentrations and the corresponding calibration curves for the peak at  $\sim 403$  nm ( $\epsilon = 26,000$   $M^{-1}cm^{-1}$ ).

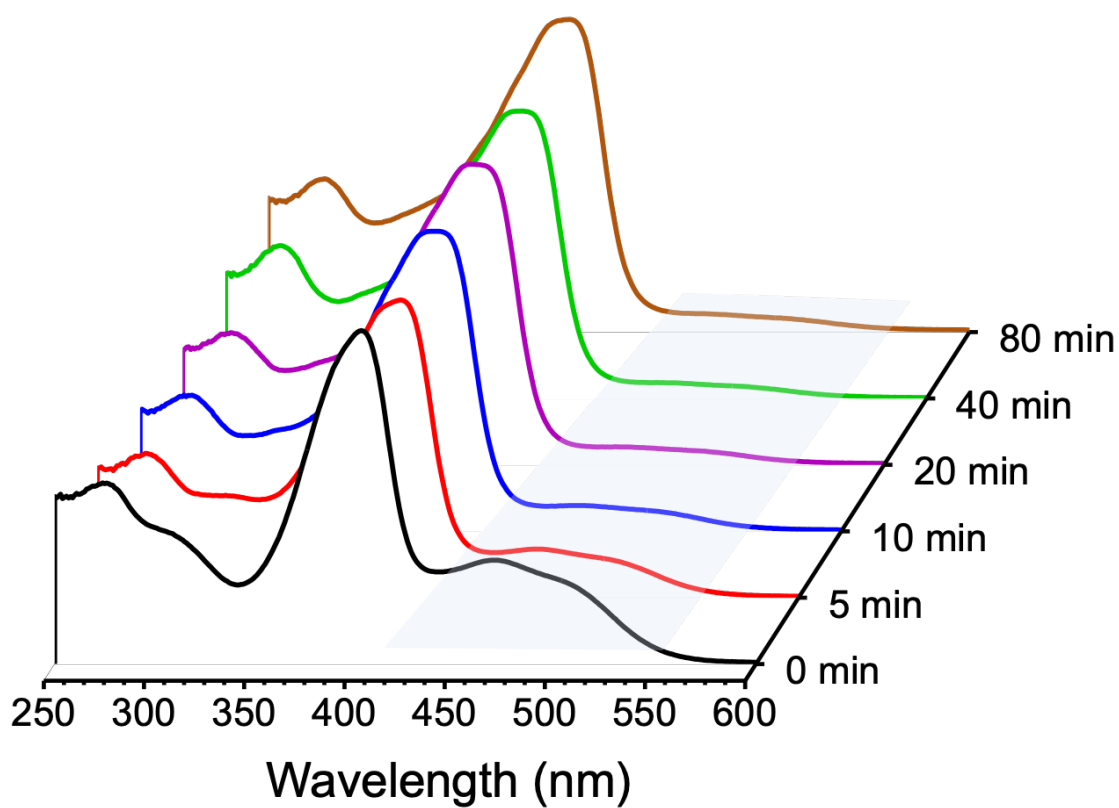

**Figure S16.** Time-course spectral evolution of the conversion of **7** to **8** upon treatment under the Nazarov cyclization conditions in acetonitrile. Legend: 0 min, black; 5 min, red; 10 min, blue; 20 min, magenta; 40 min, green; 80 min, brown.

(3)  $^1\text{H}$  NMR assignments for model phyllobilin **8**.

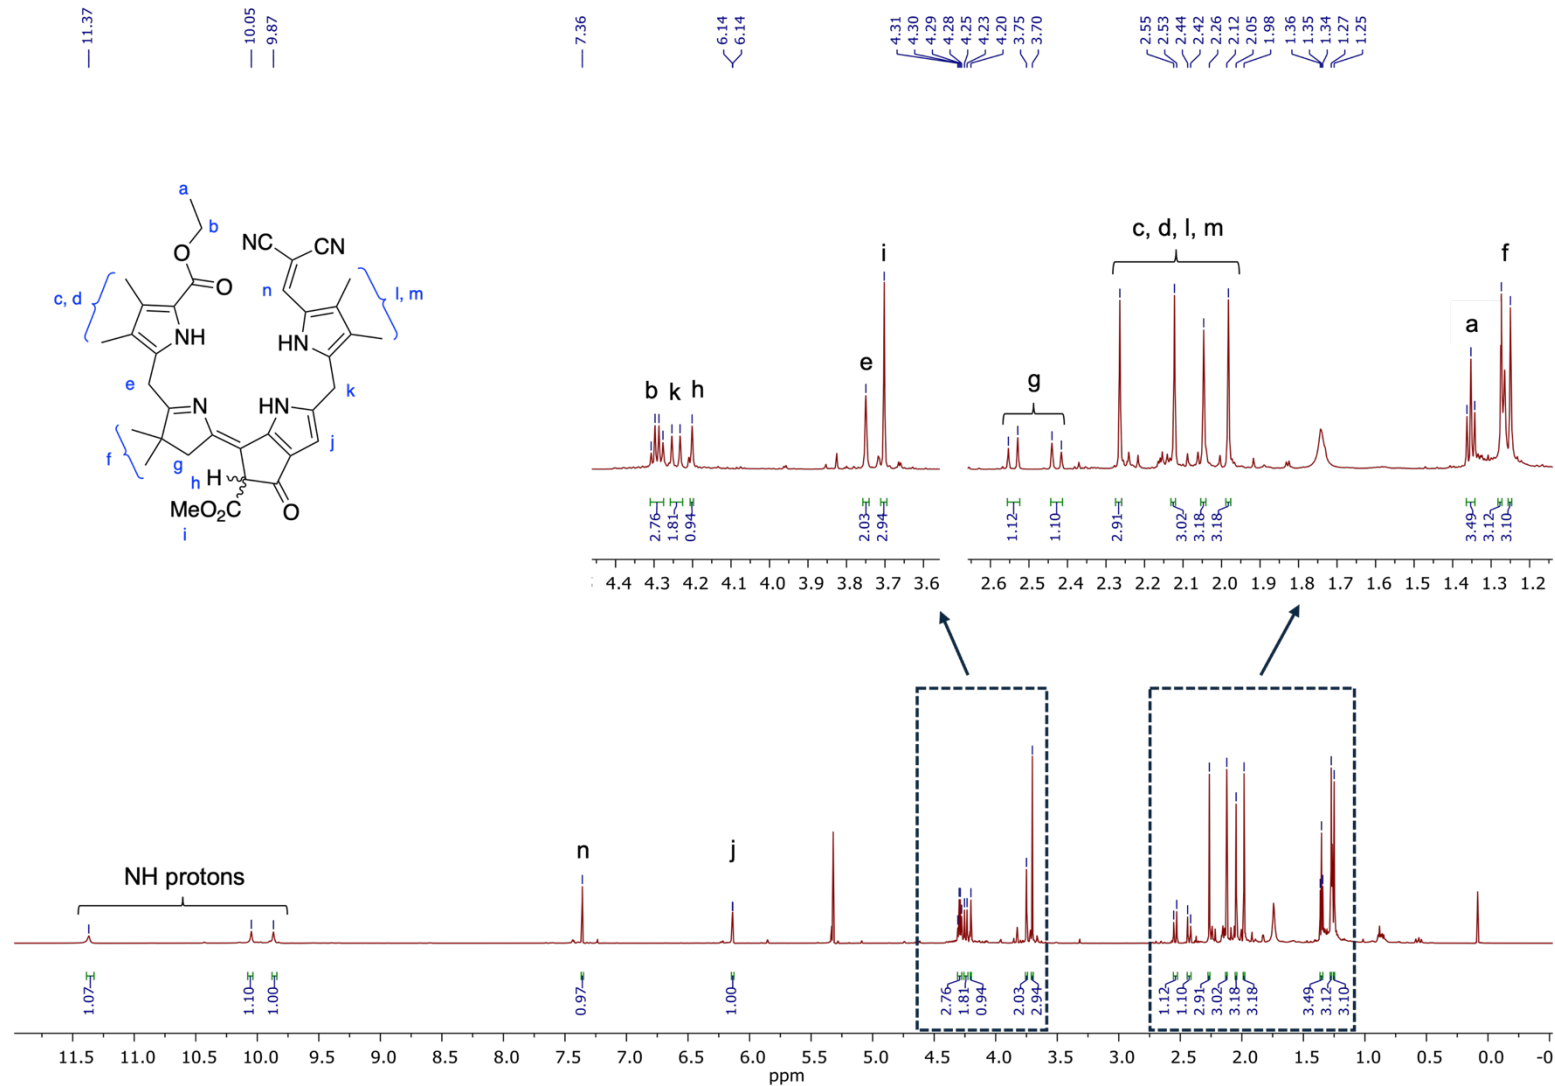

Figure S17.  $^1\text{H}$  NMR (700 MHz,  $\text{CD}_2\text{Cl}_2$ ) assignment of model phyllobilin **8**.

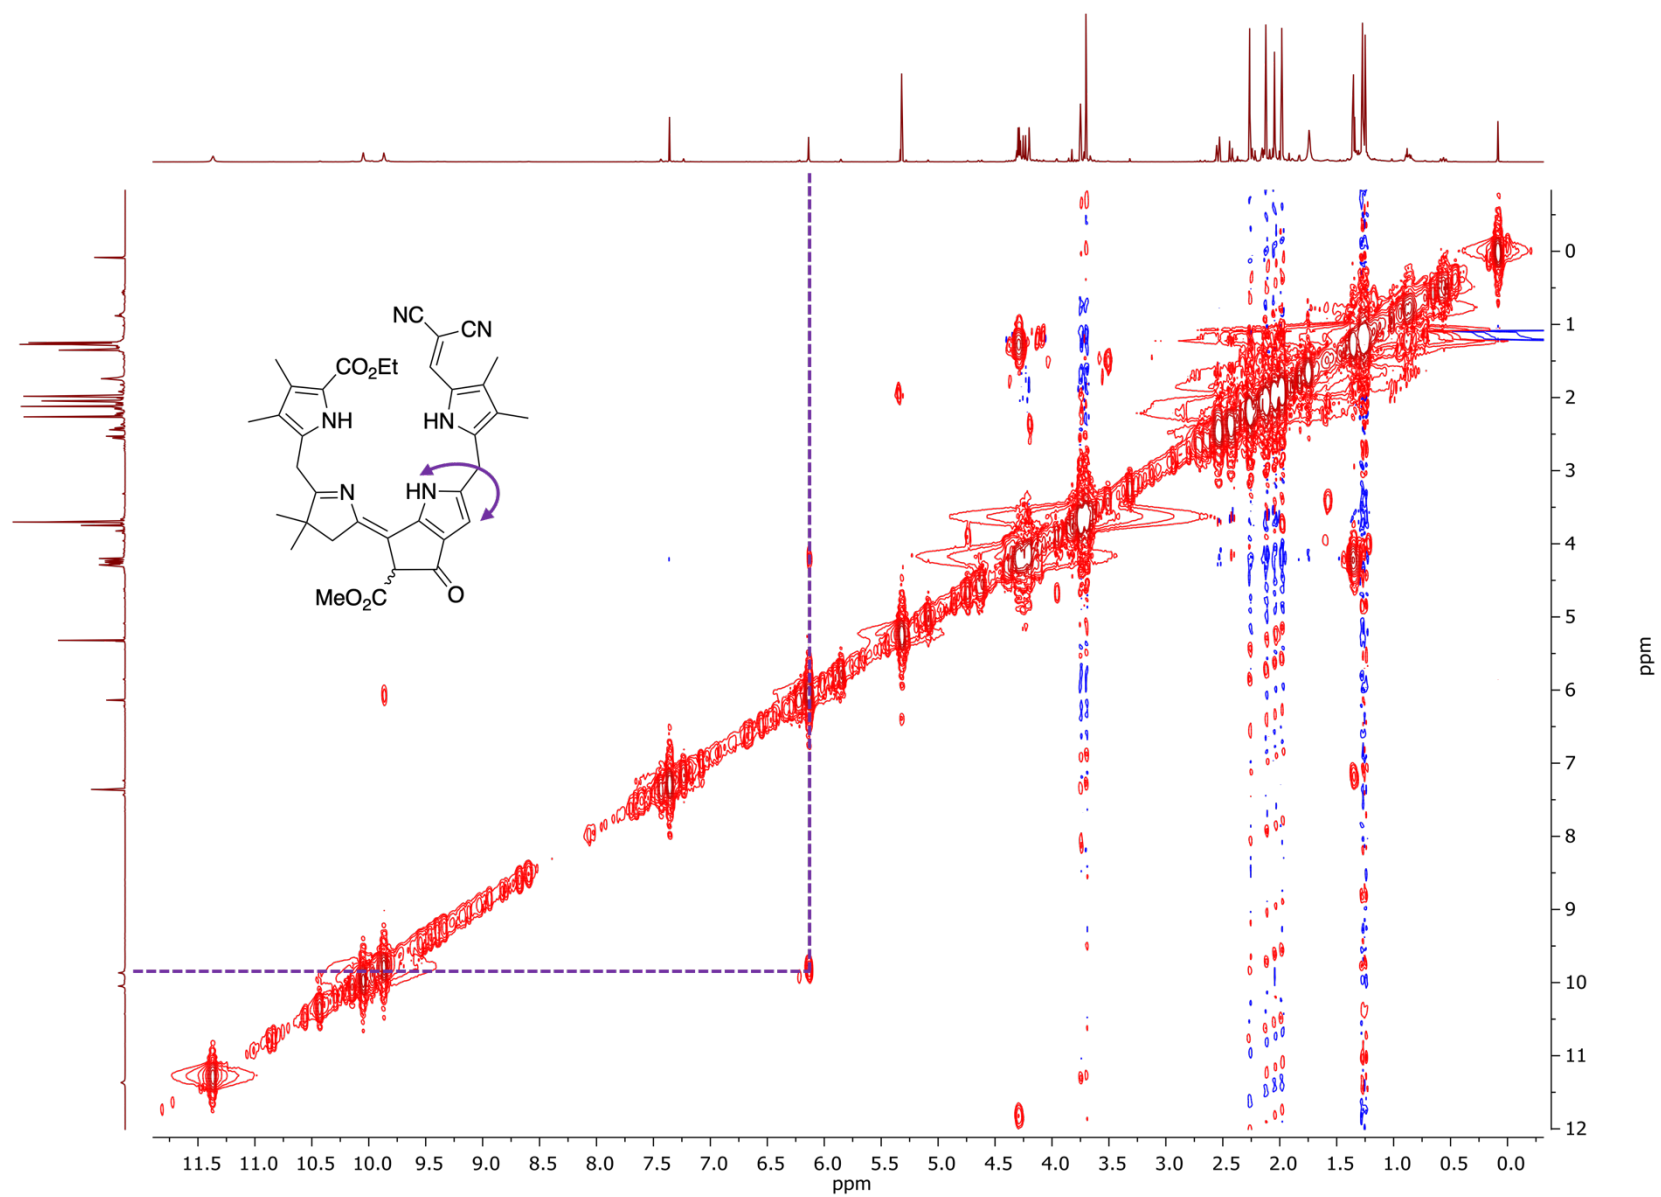

**Figure S18.** Full COSY spectrum (700 MHz, CD<sub>2</sub>Cl<sub>2</sub>) of model phyllobilin **8**.

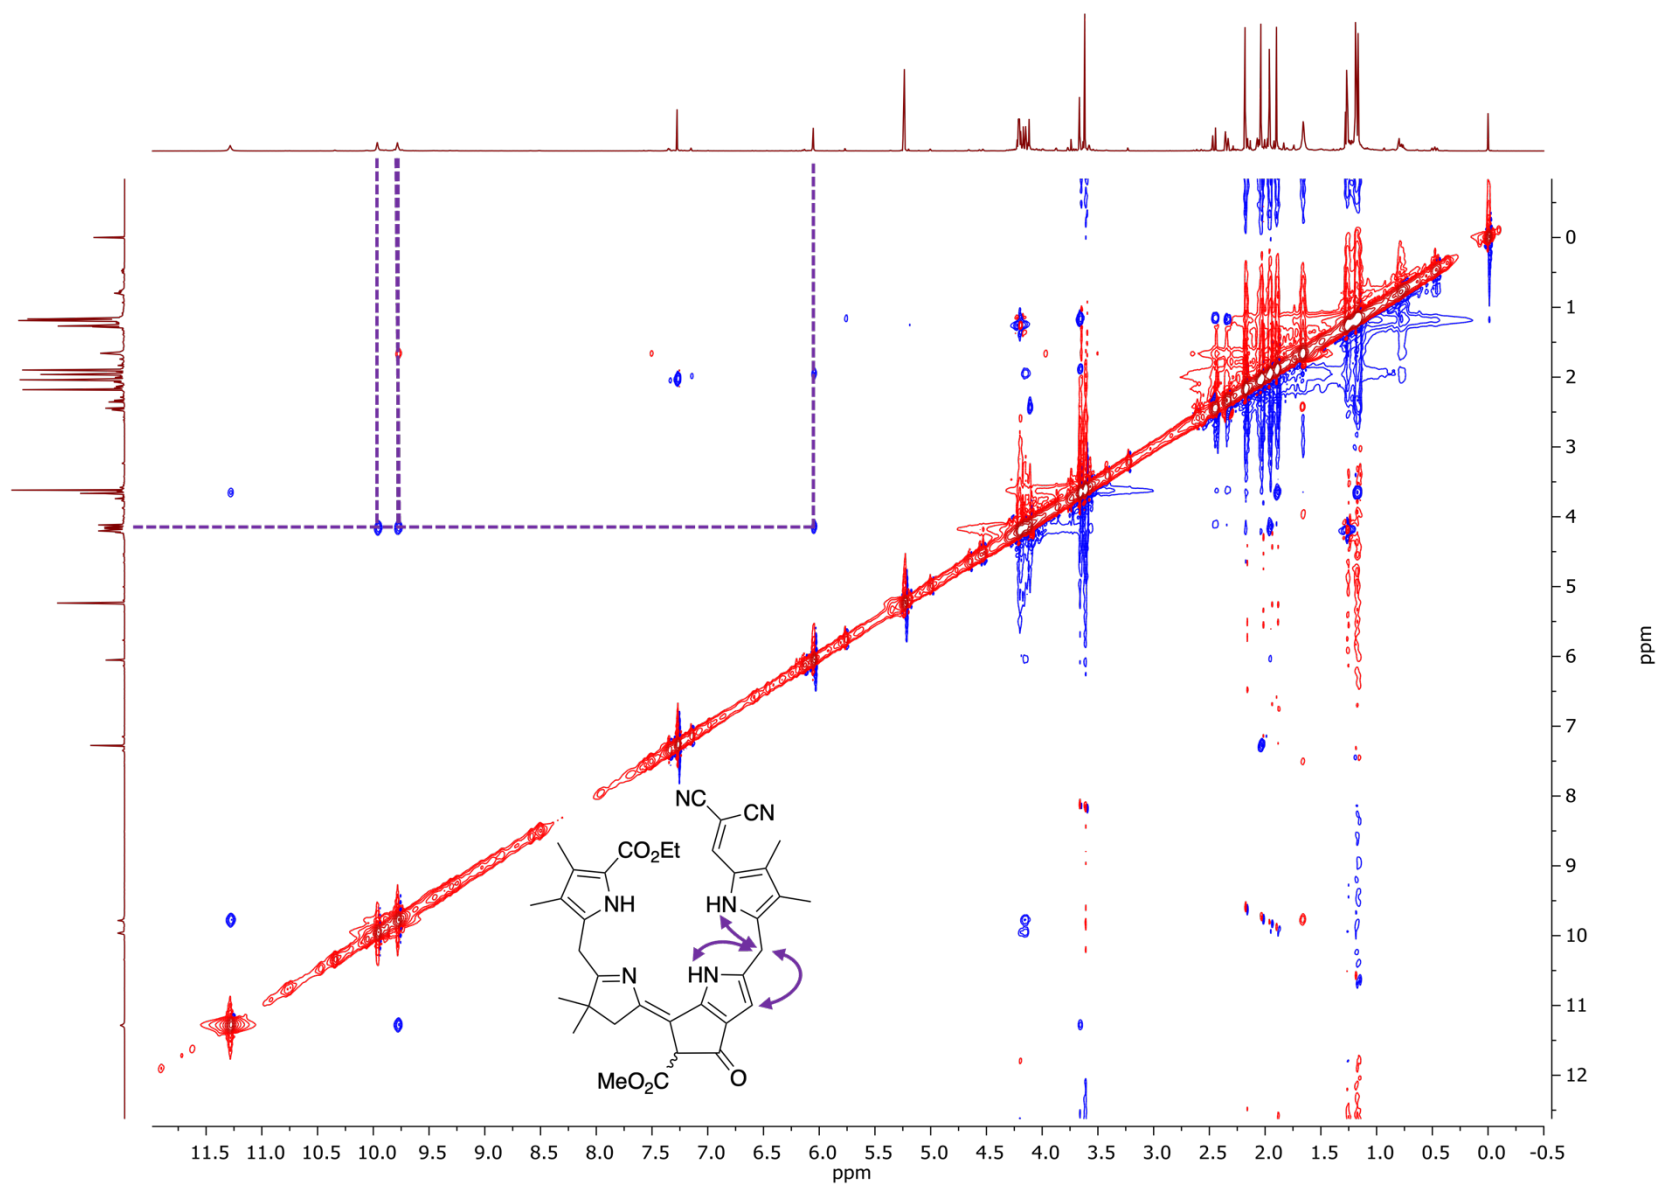

**Figure S19.** Full NOESY spectrum (700 MHz, CD<sub>2</sub>Cl<sub>2</sub>) of model phyllobilin 8.

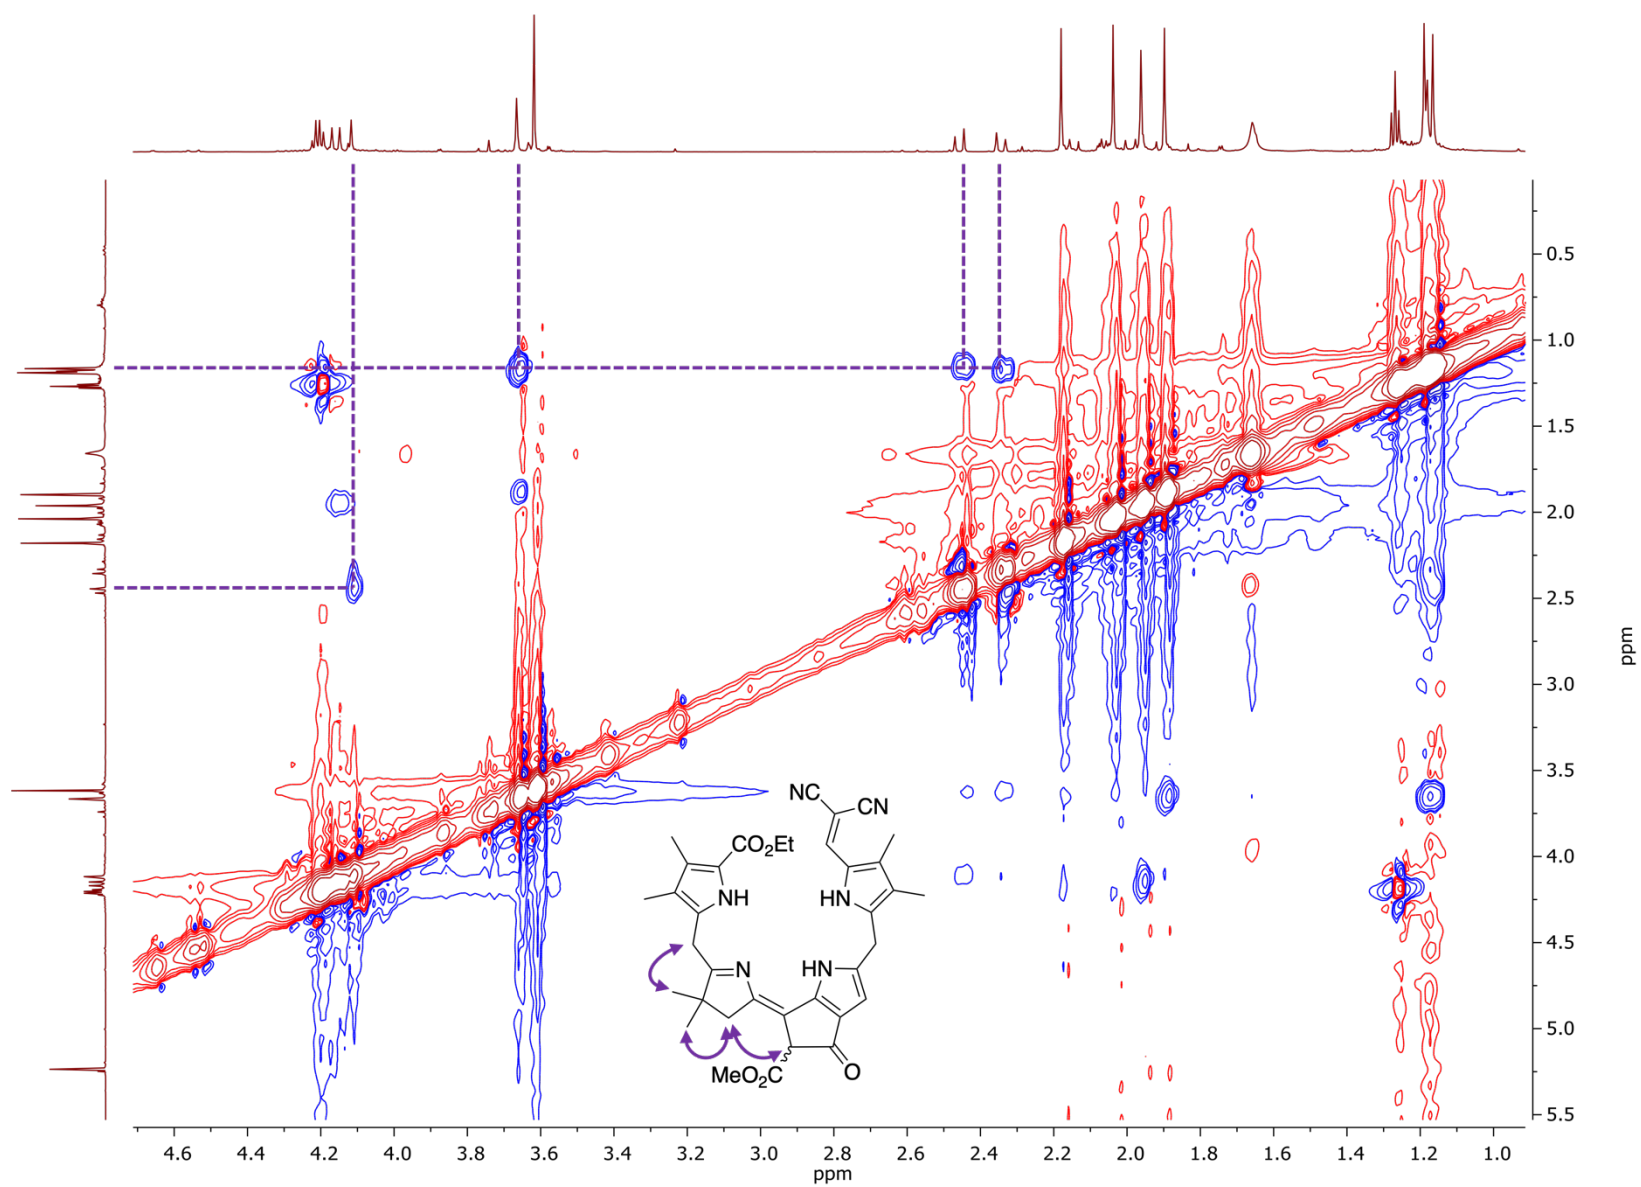

**Figure S20.** Enlarged NOESY spectrum (700 MHz, CD<sub>2</sub>Cl<sub>2</sub>) of model phyllobilin **8**.

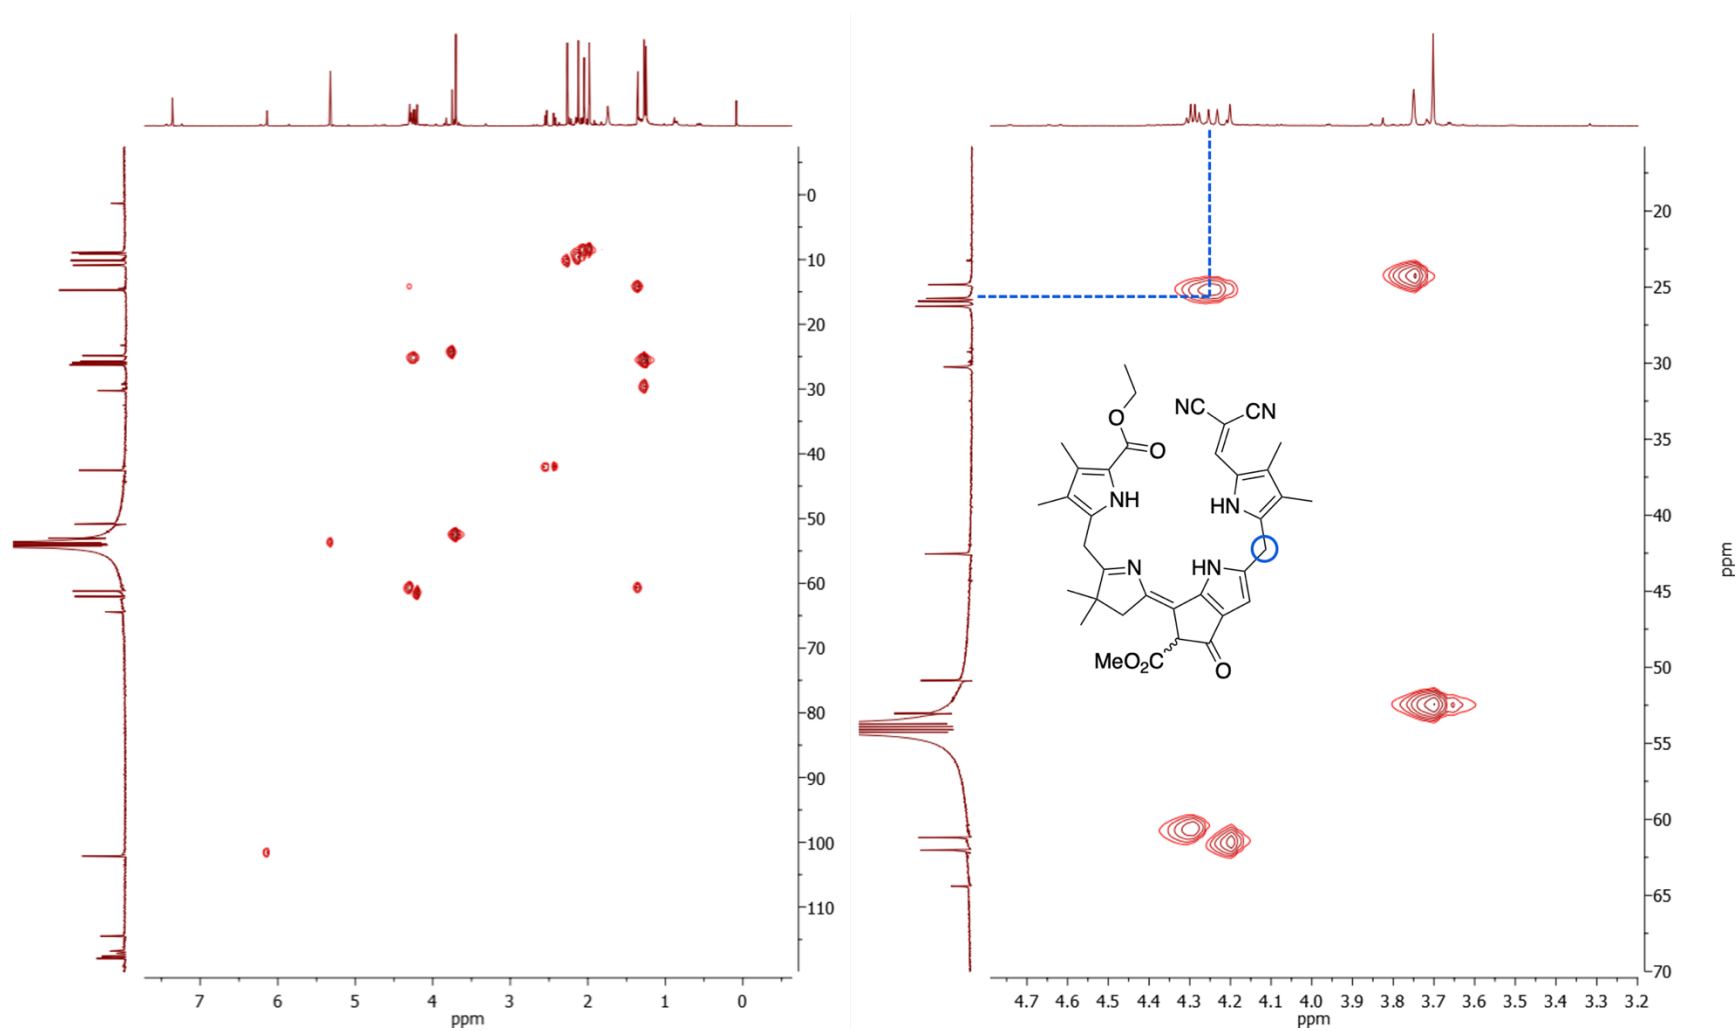

**Figure S21.** Full HSQC spectrum (700 MHz, CD<sub>2</sub>Cl<sub>2</sub>) of model phyllobilin **8** (left) and enlarged region showing the correlations of the methylene protons and those at position 5.

(4) Spectral data.

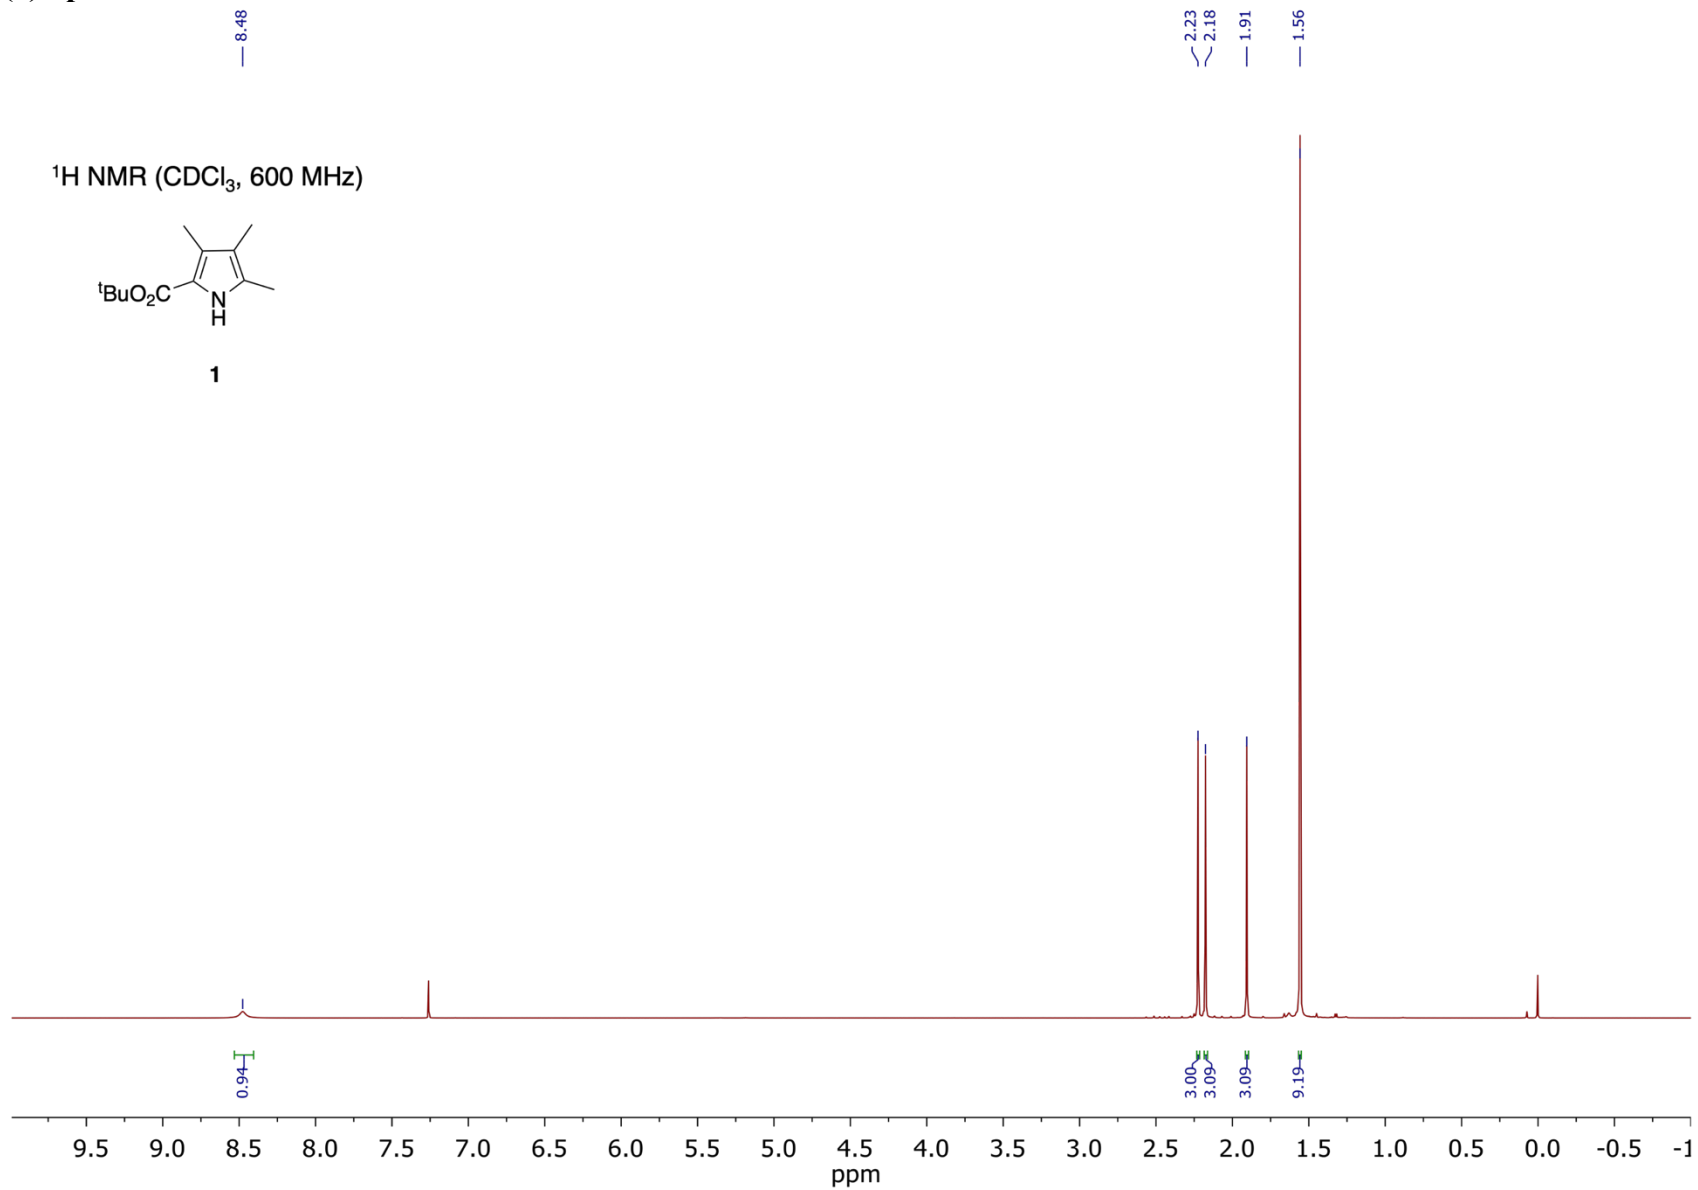



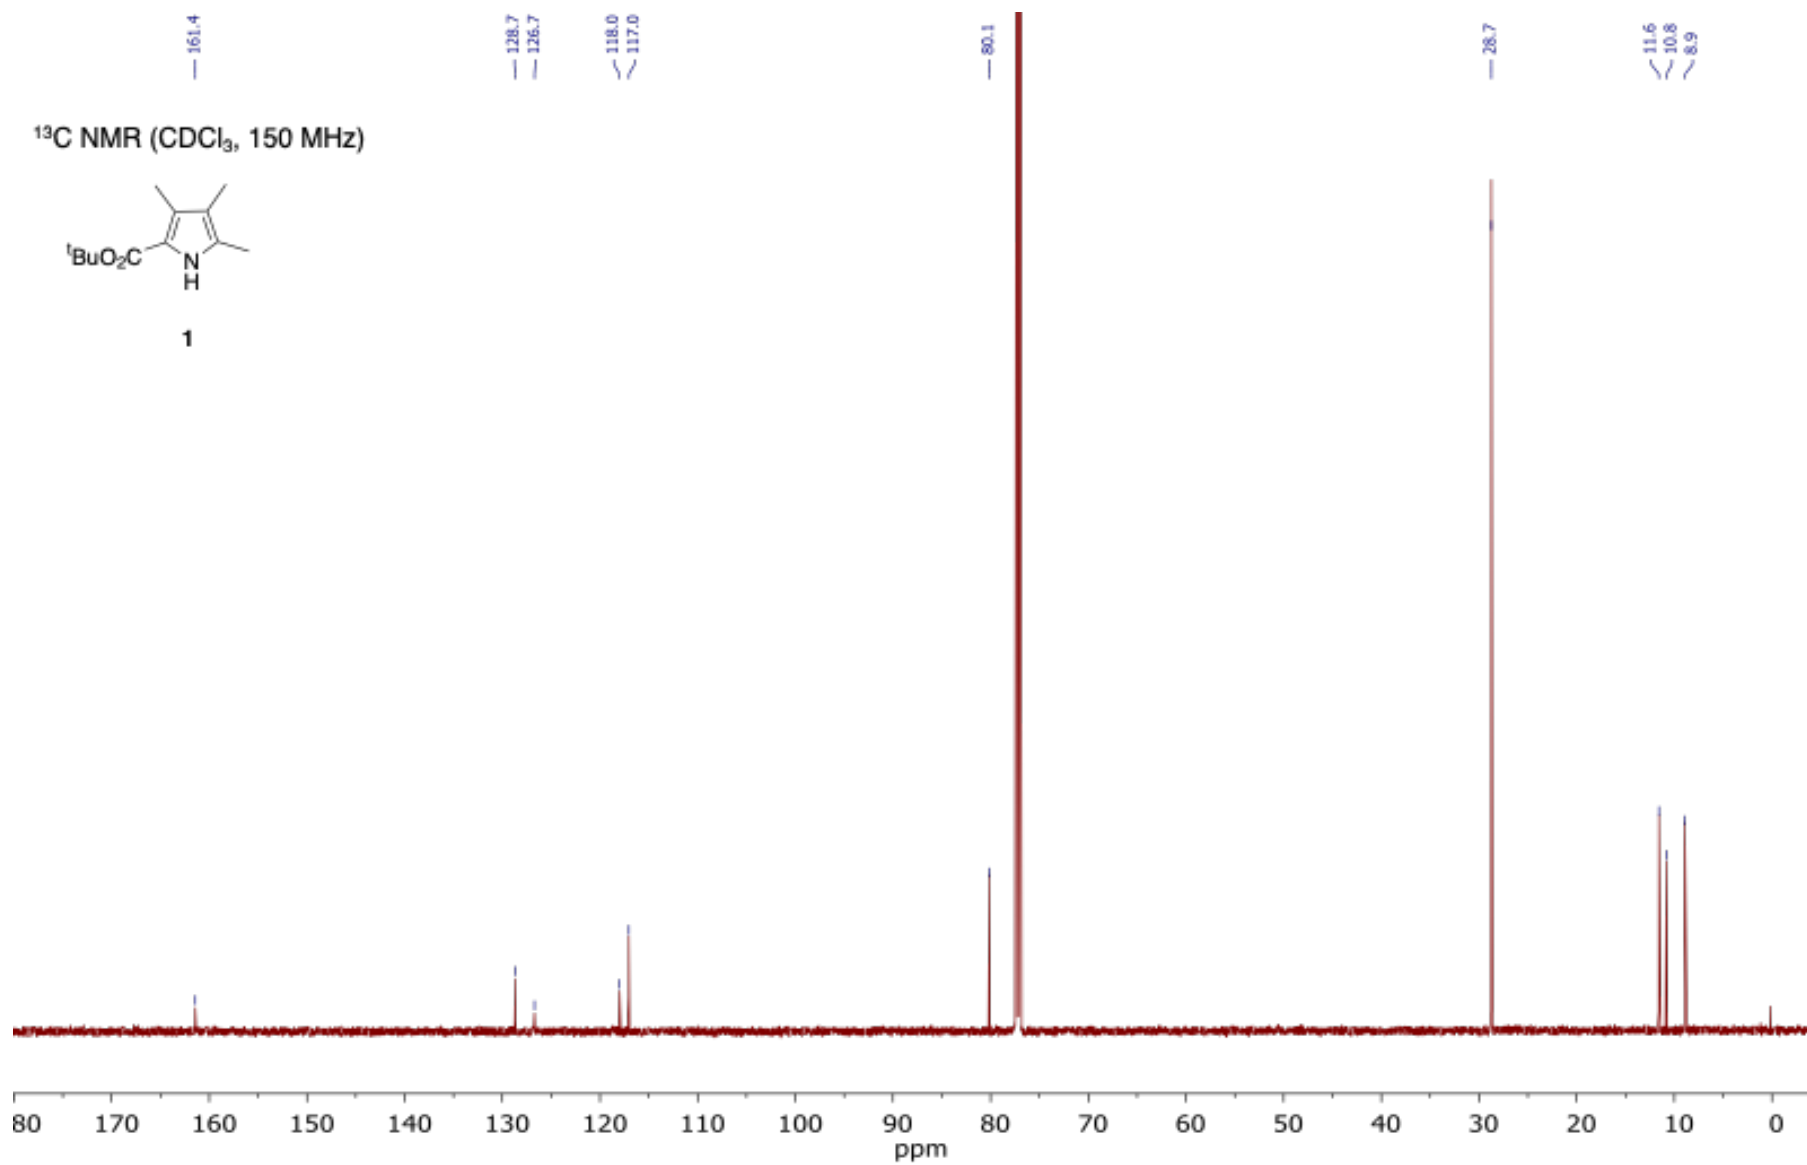

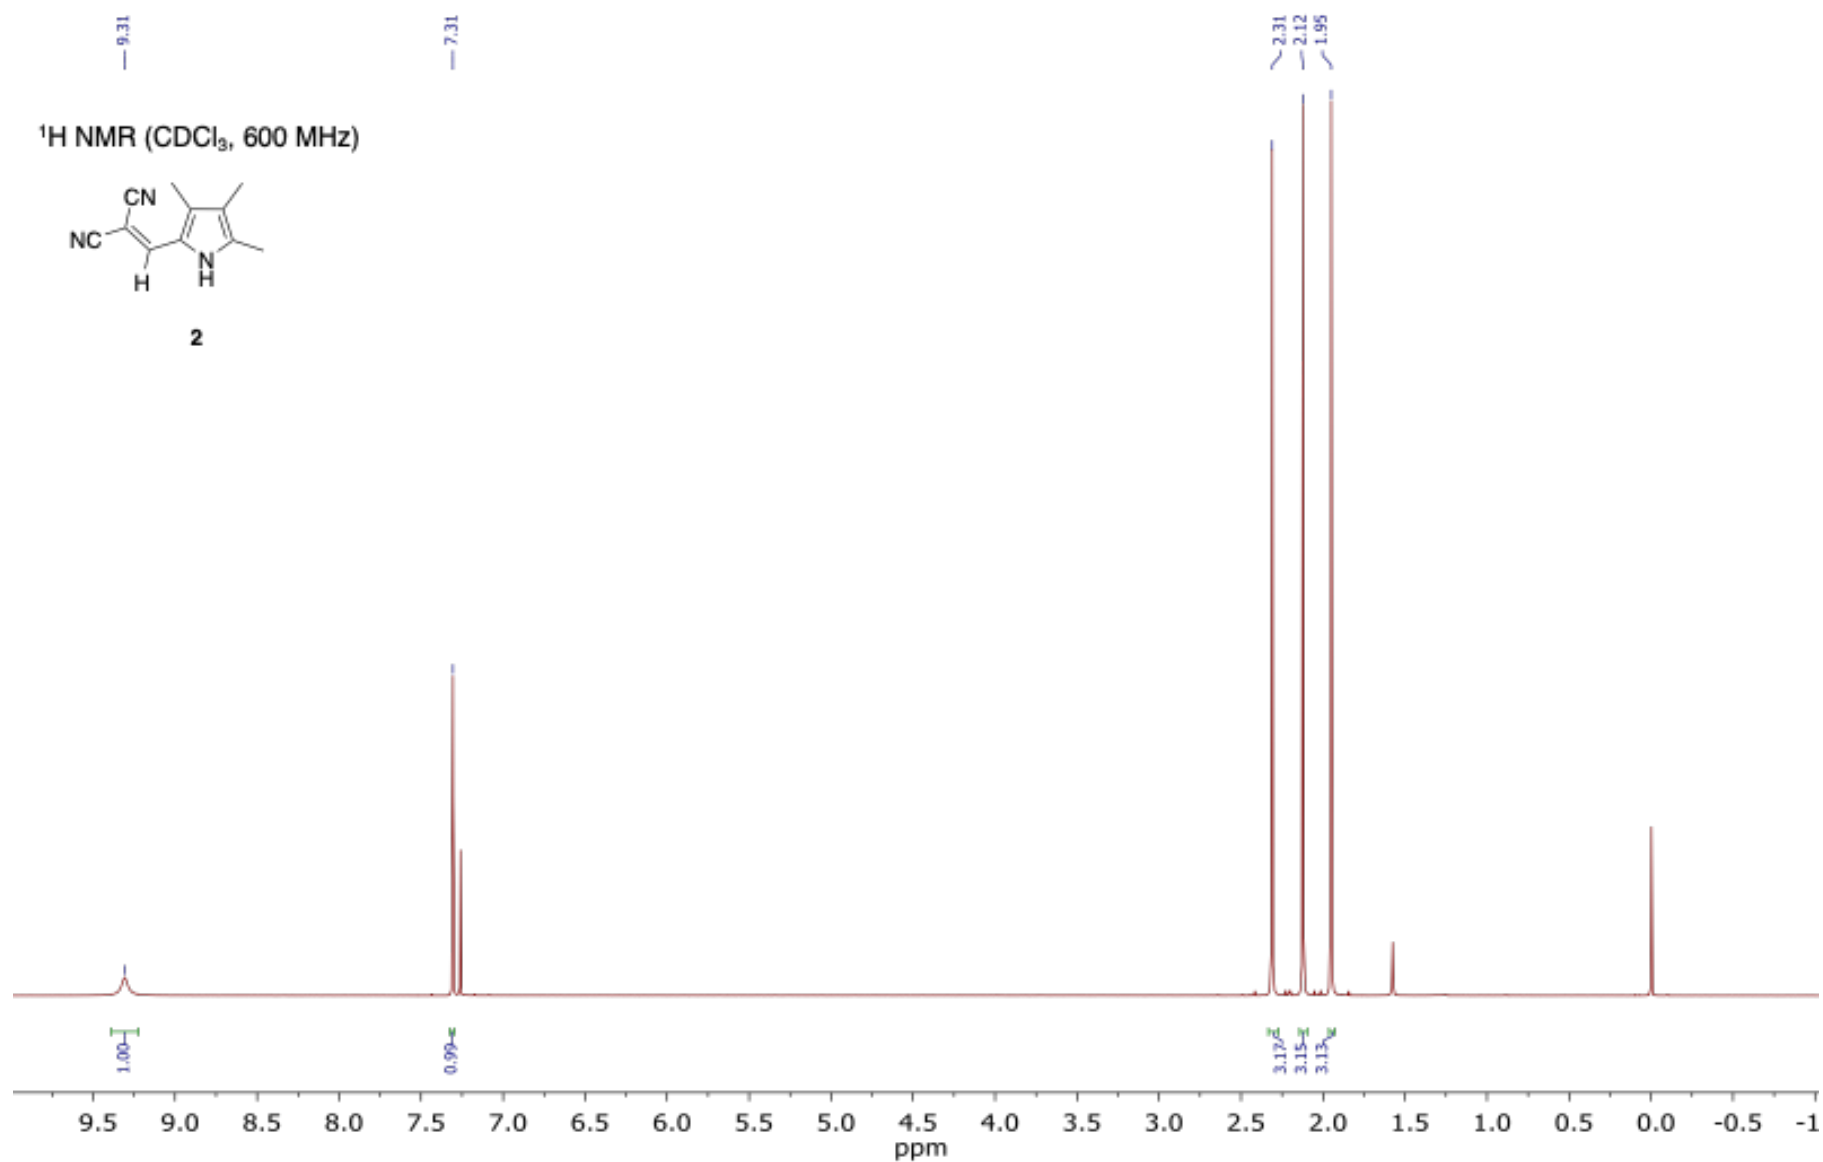

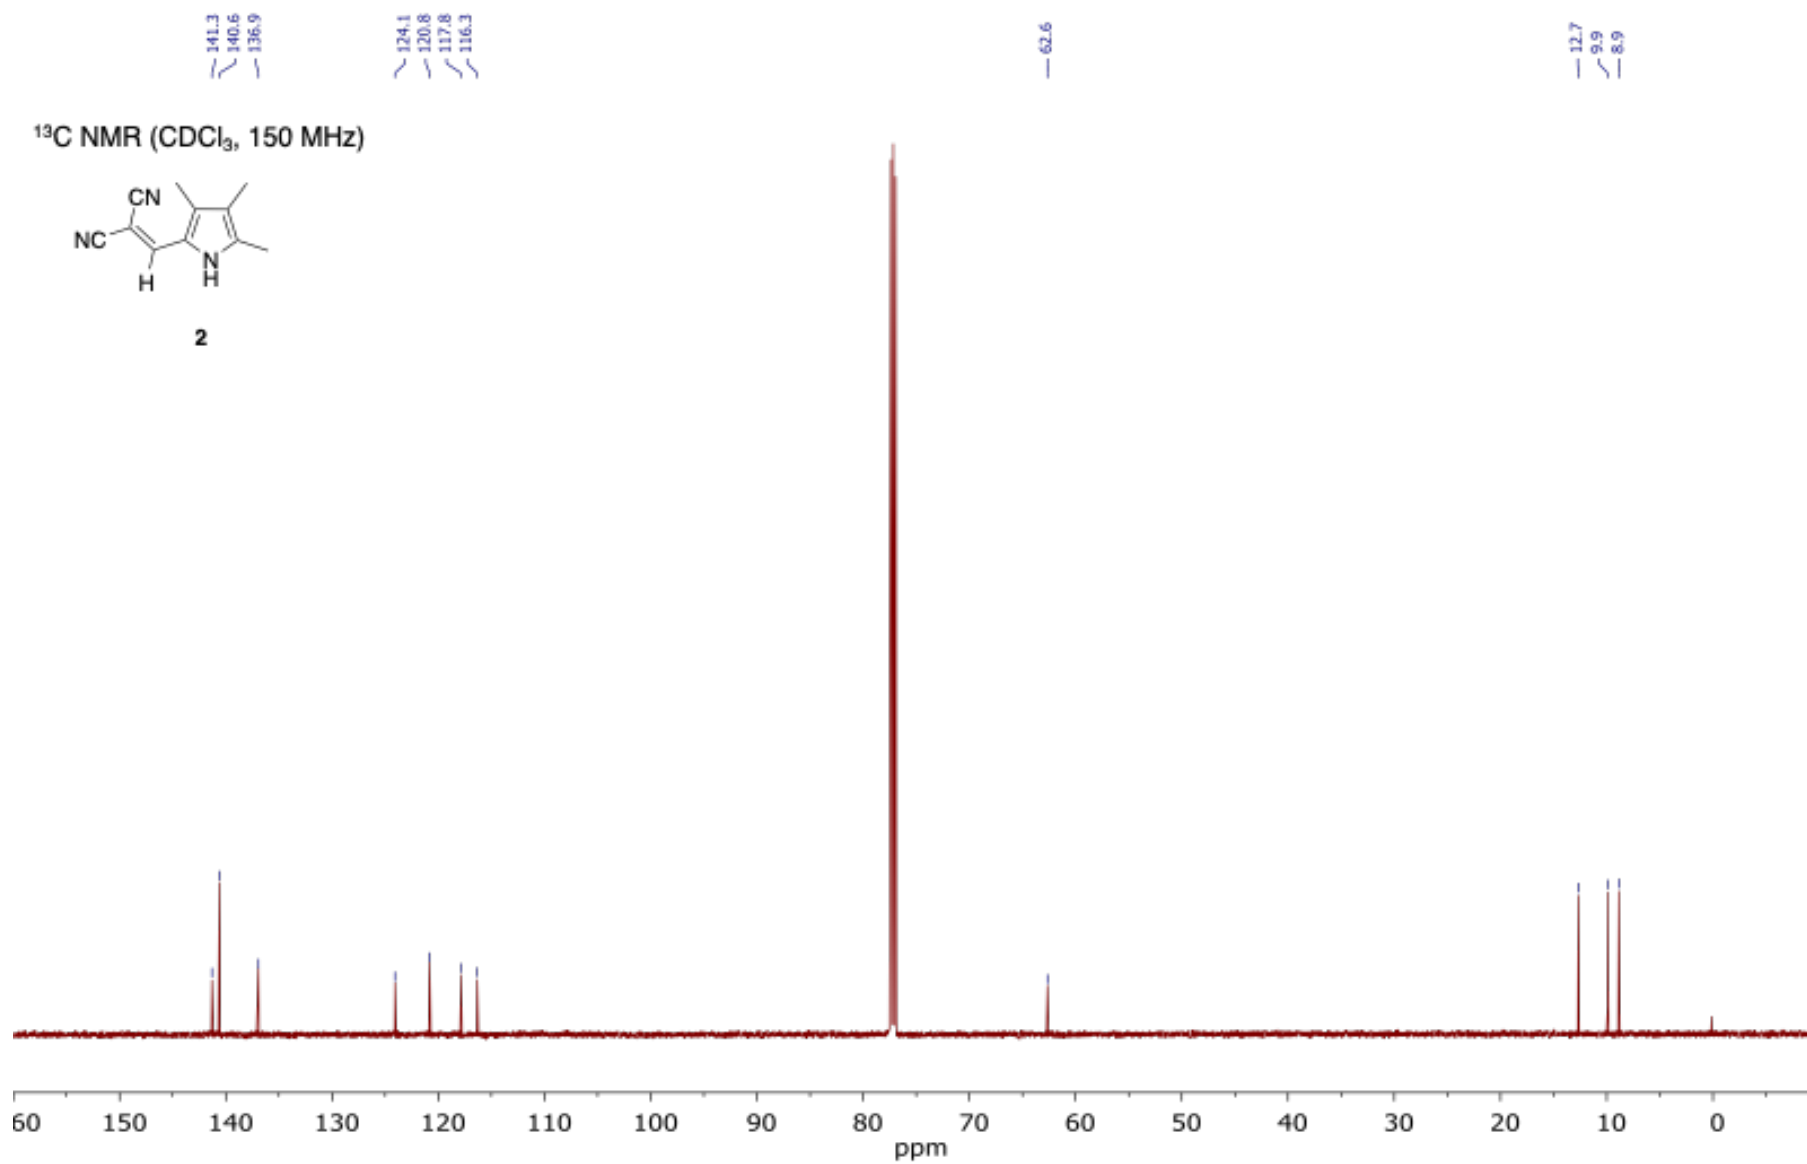

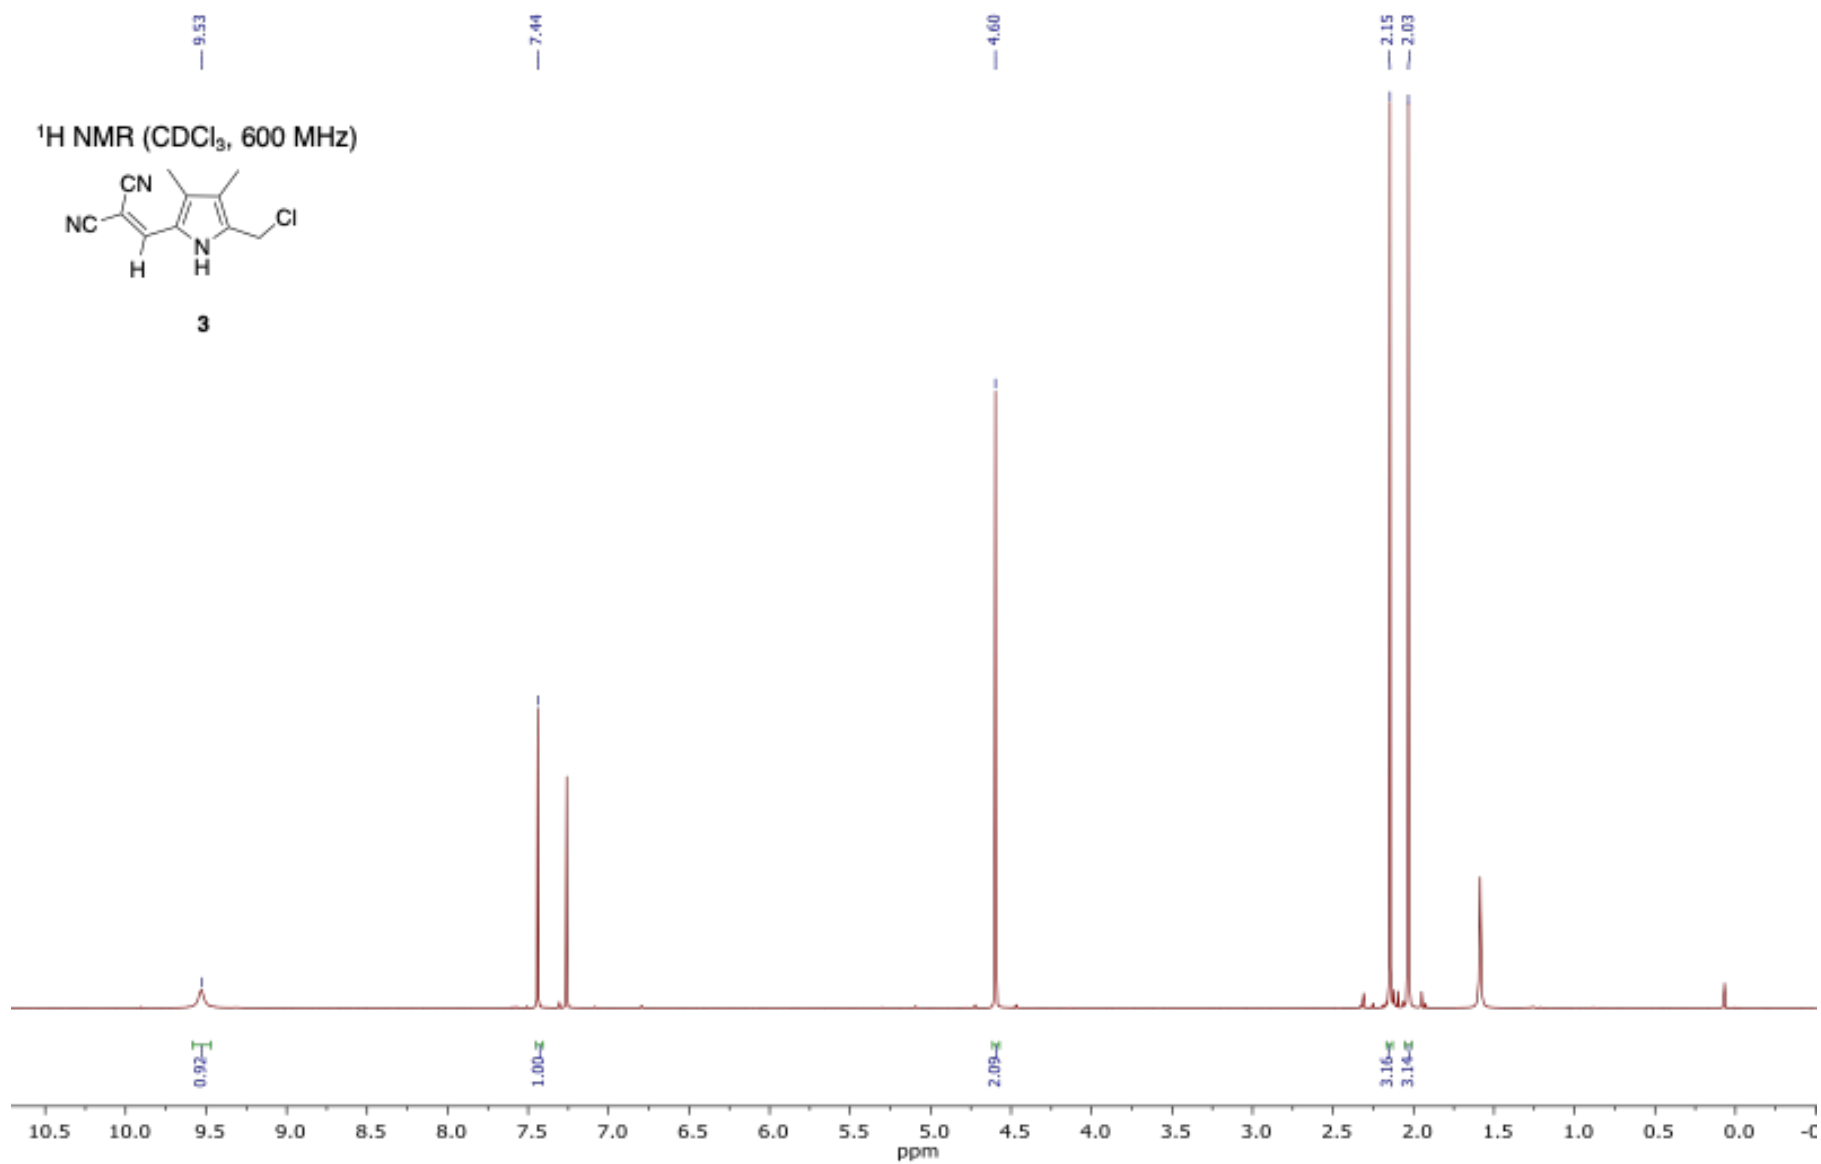

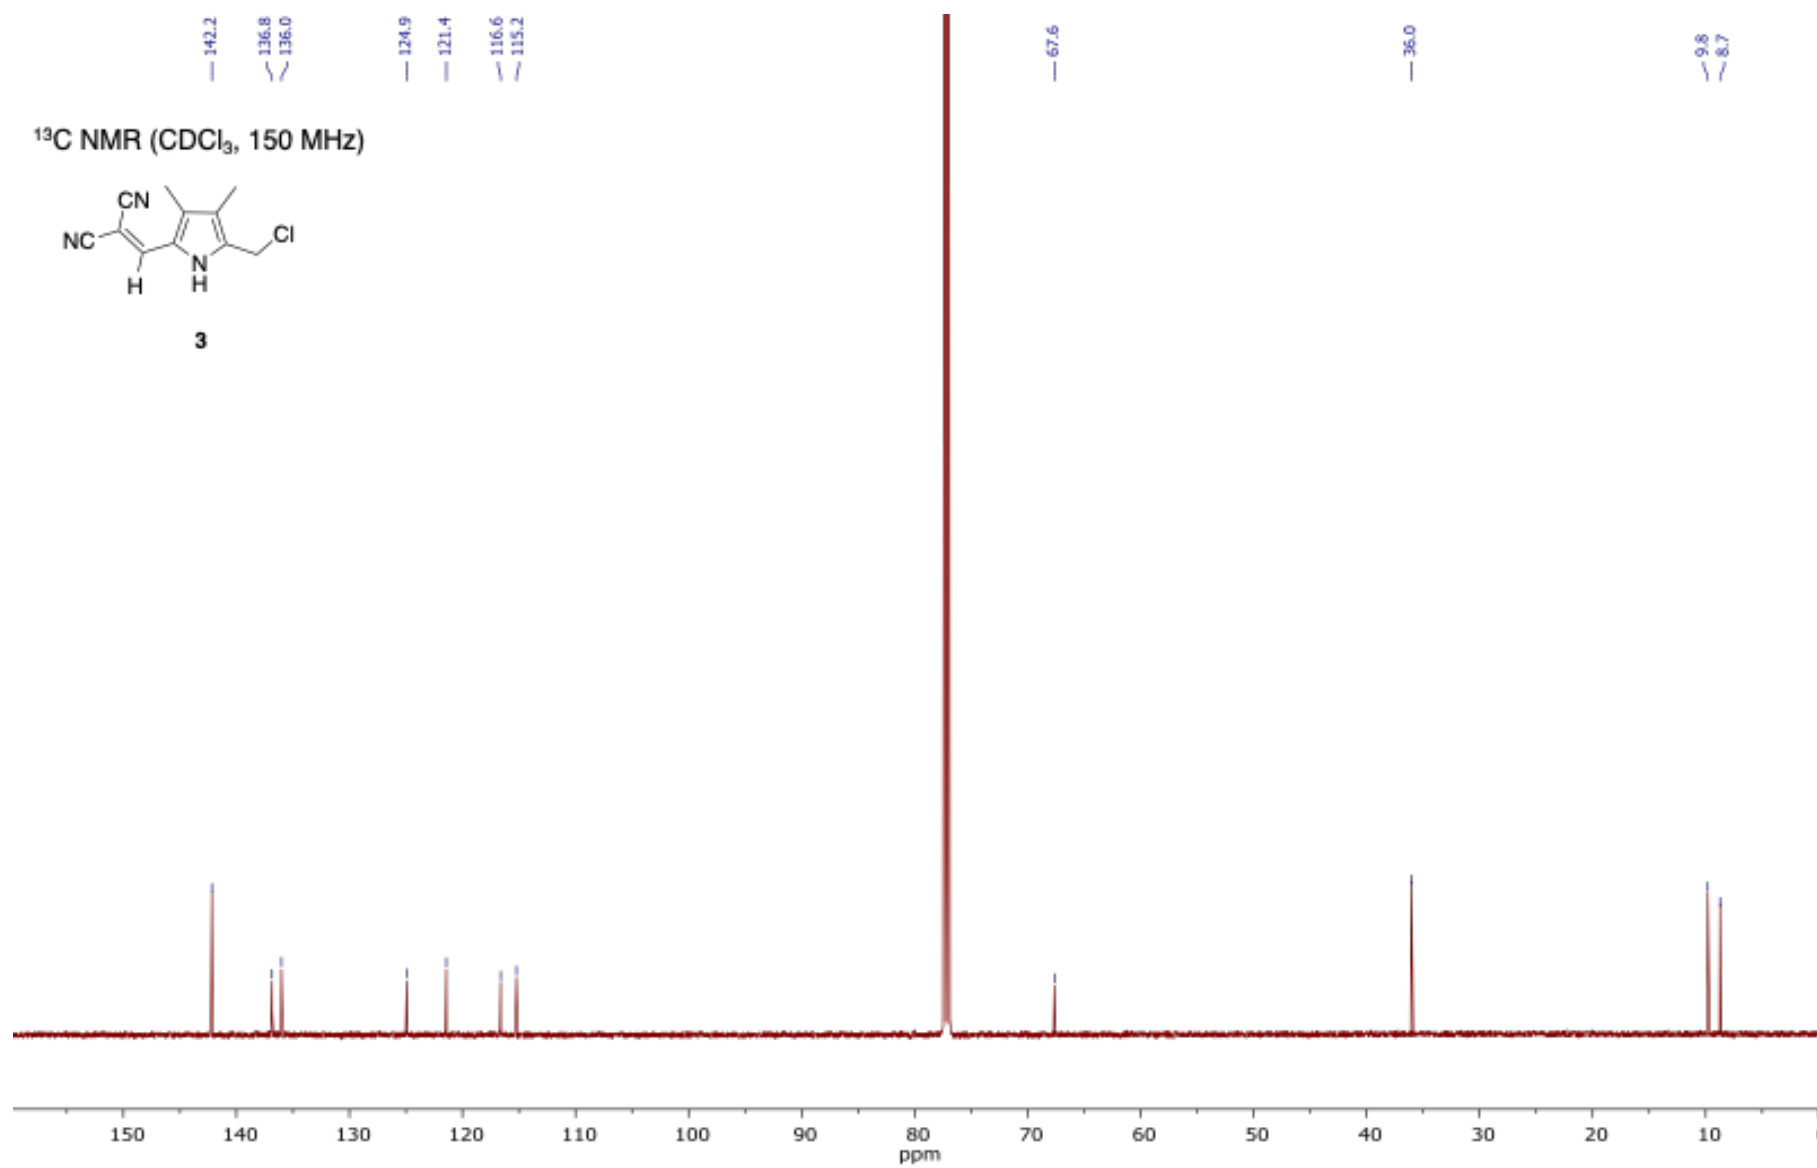

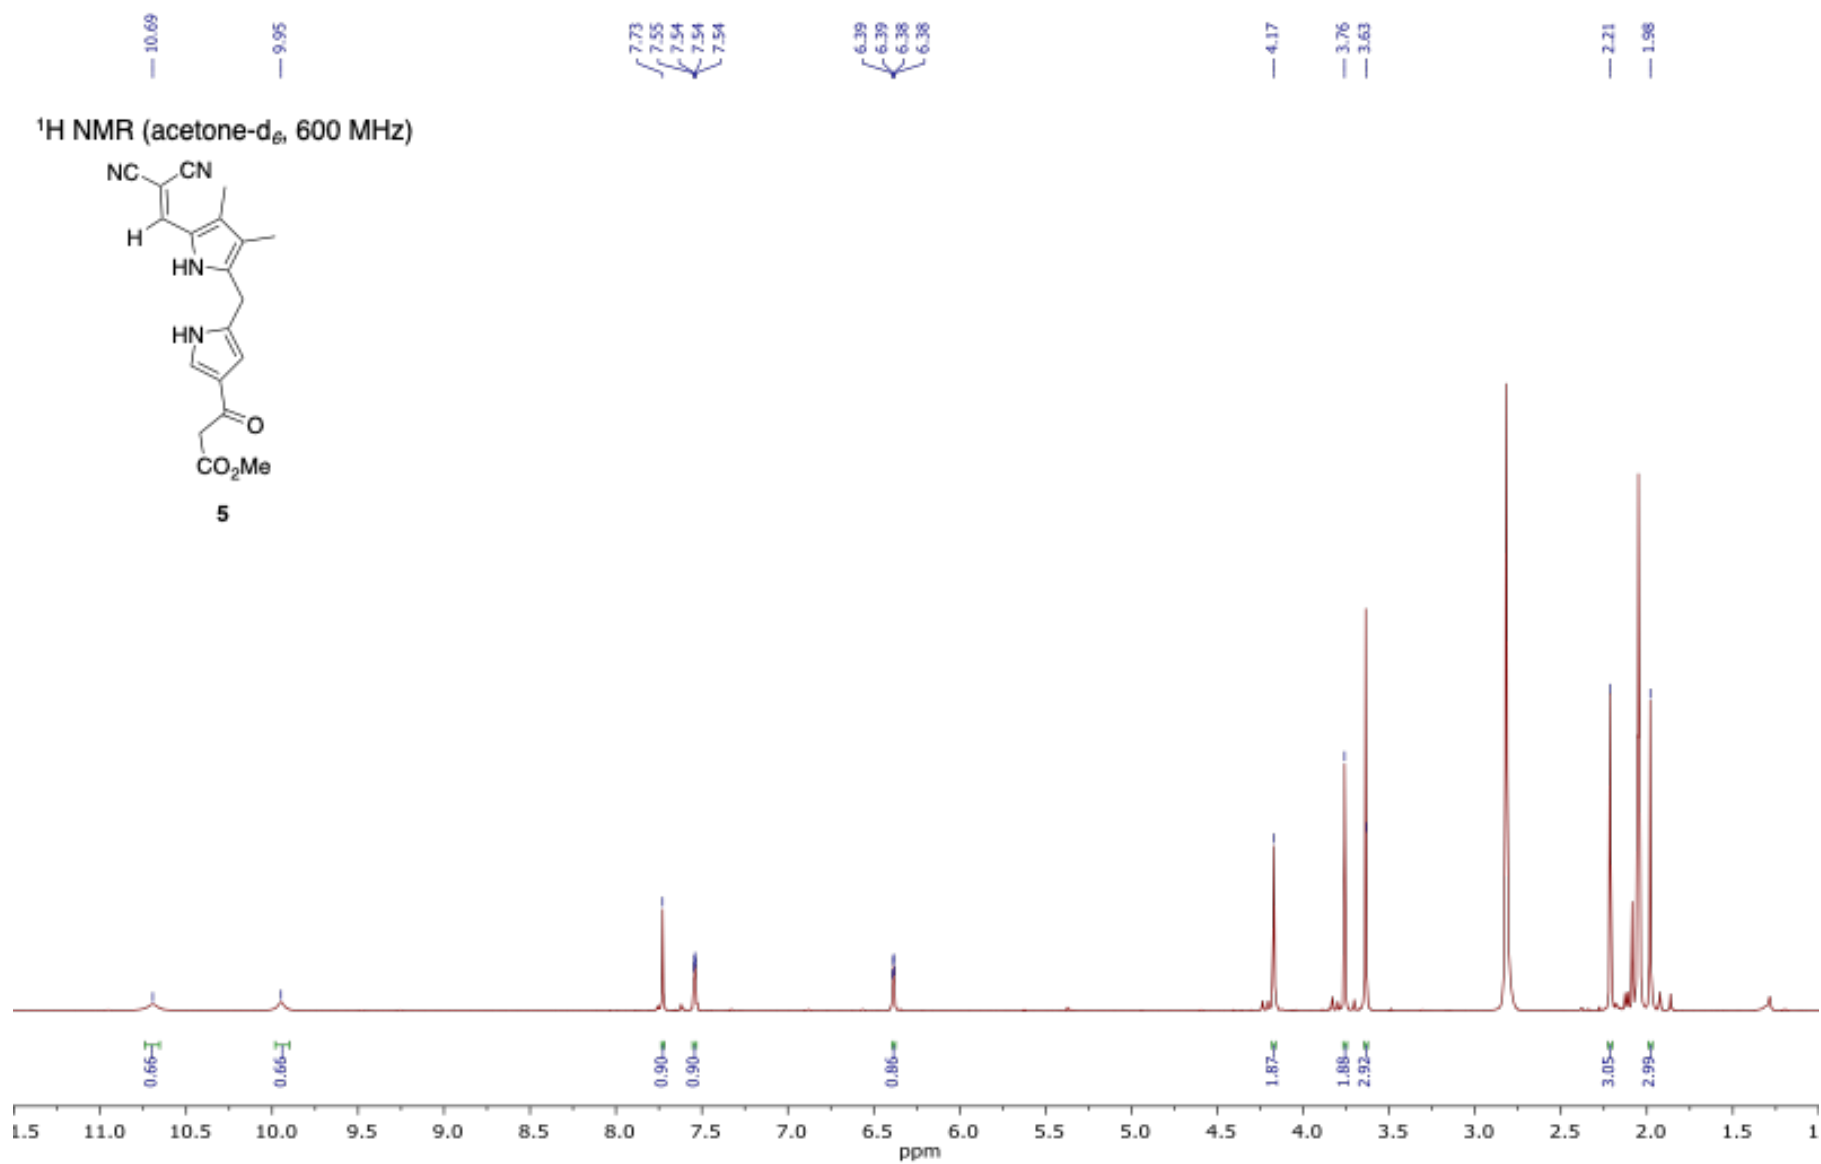

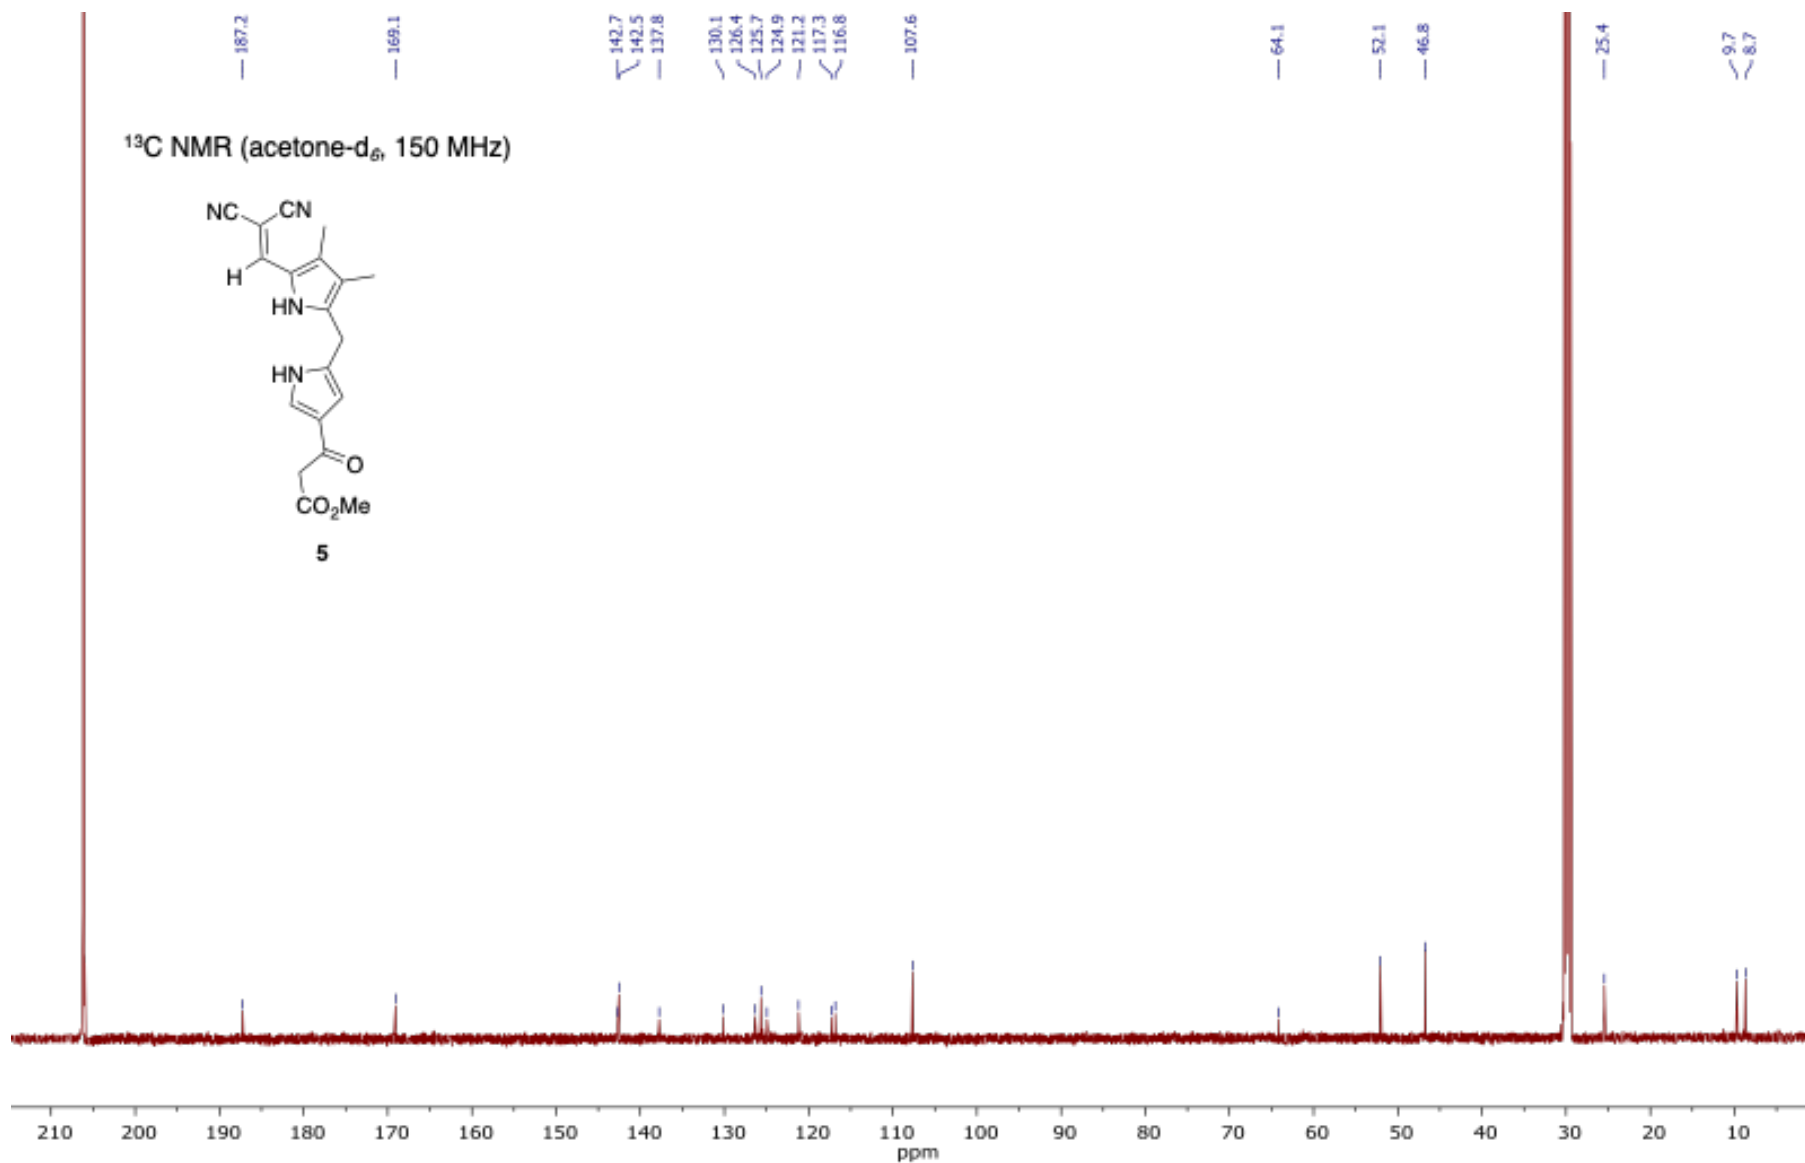

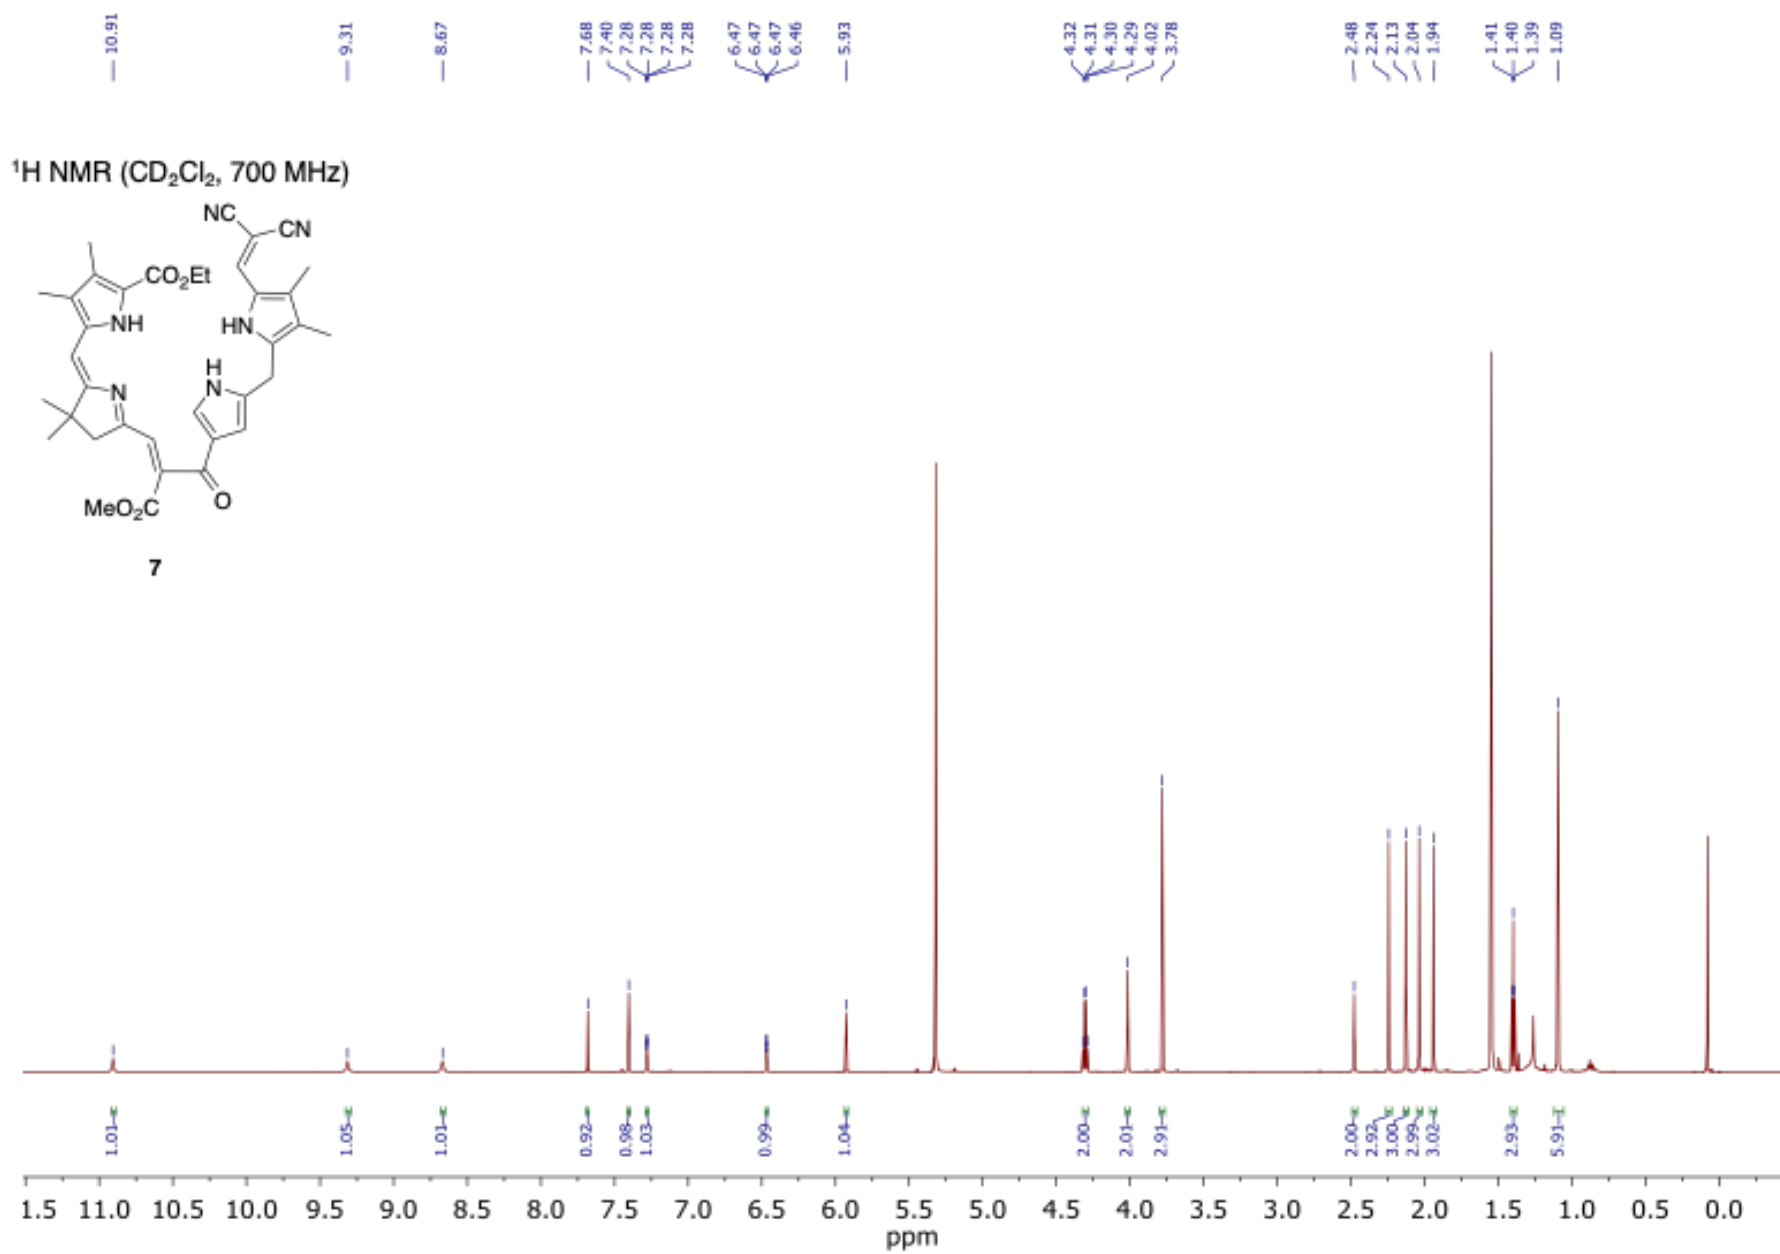



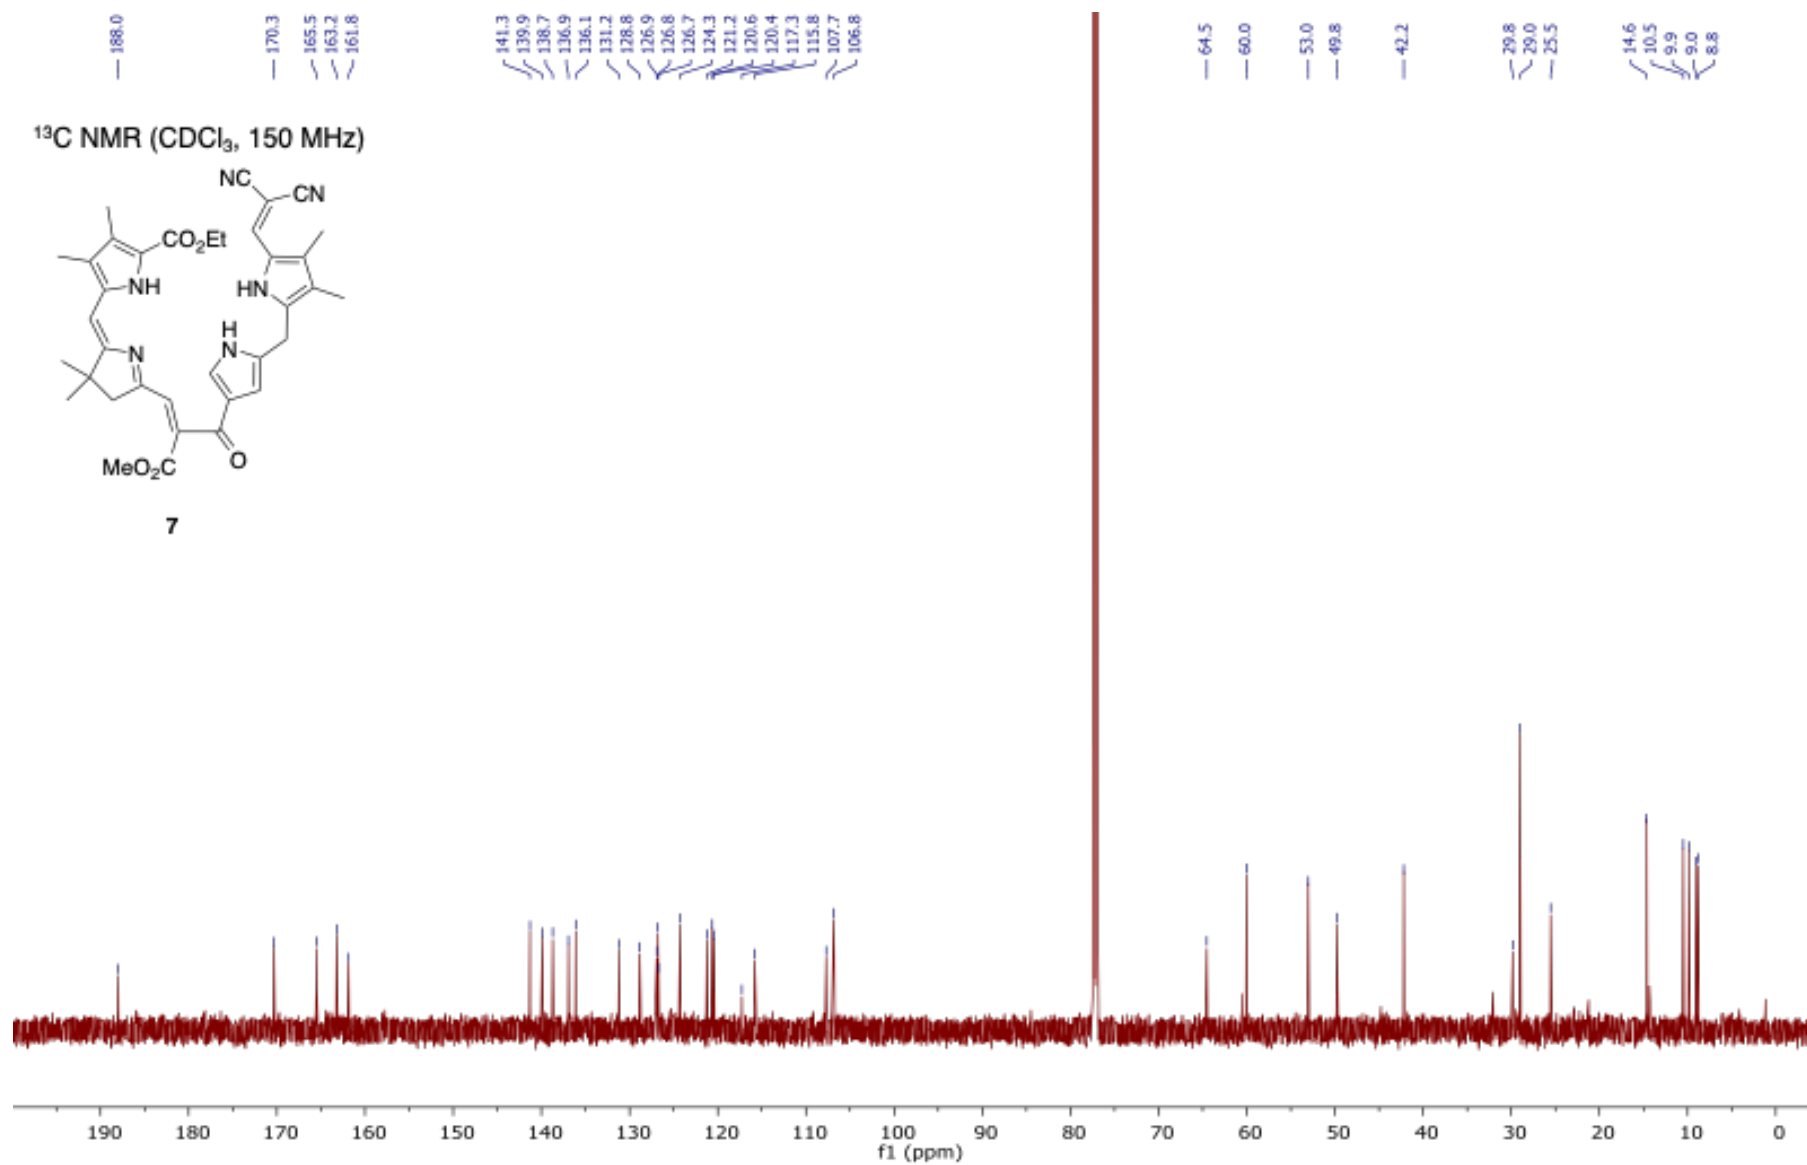

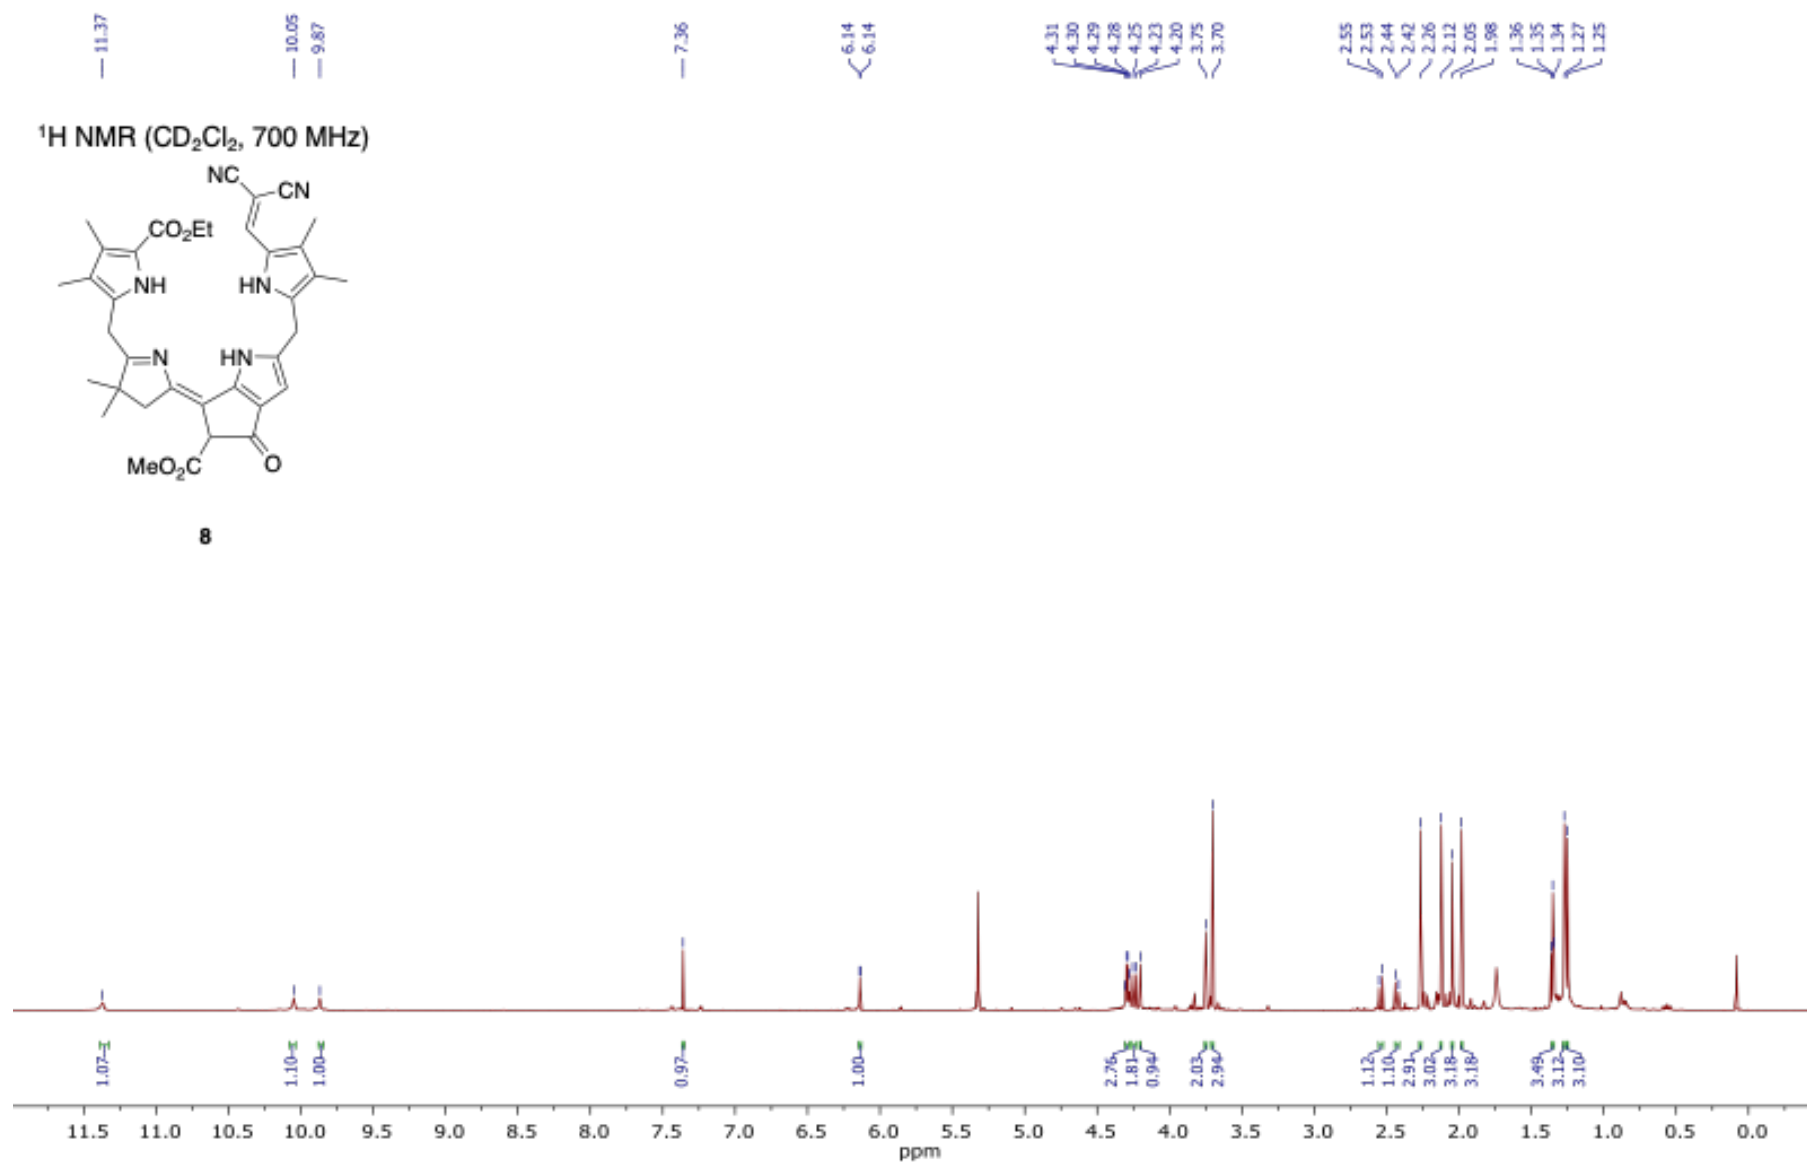

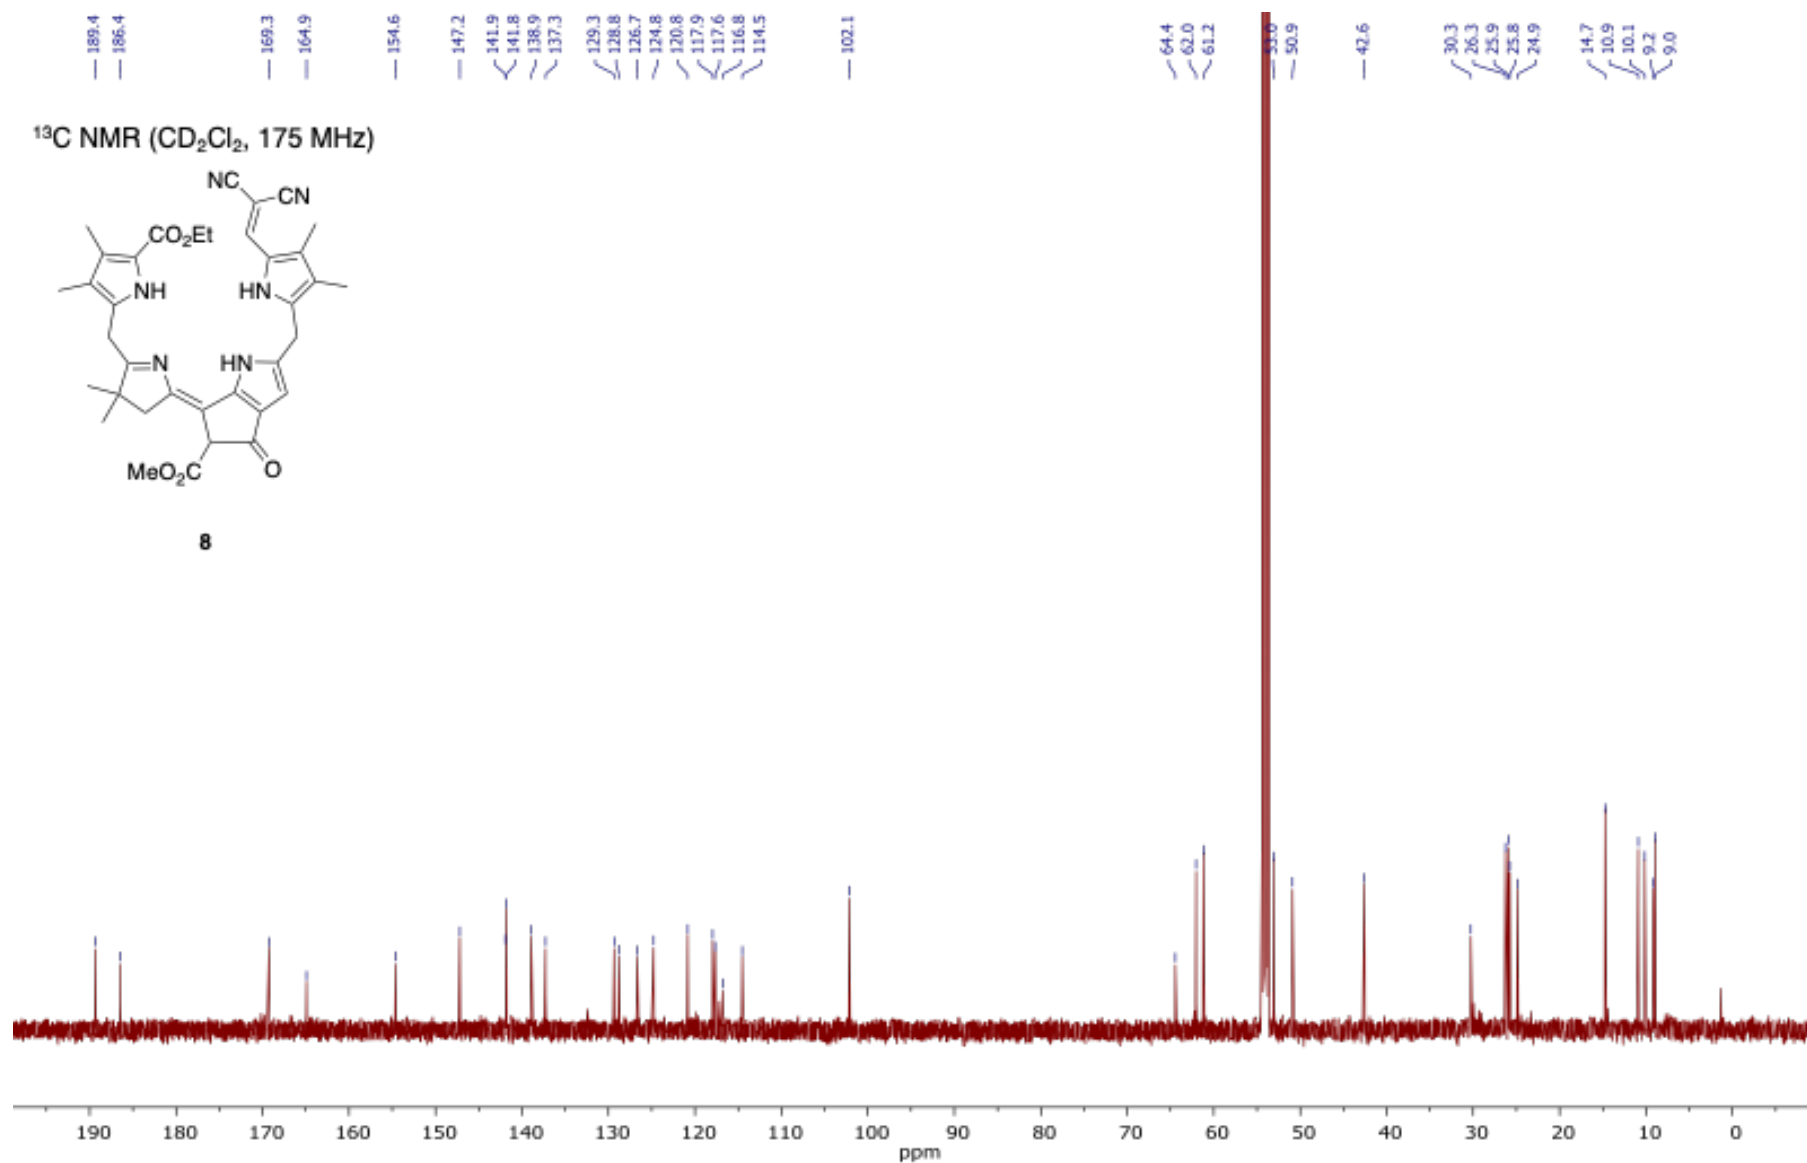

Supplement: d4nj01533a1.pdf [file d4nj01533a1.pdf]
